# Supplementary material for: Cadaveric simulation versus standard training for postgraduate trauma and orthopaedic surgical trainees: protocol for the CAD:TRAUMA study multicentre randomised controlled educational trial
Source: PubMed Central journal article supplement (PMC7520841; doi:10.1136/bmjopen-2020-037319), 2020-09-25
Supplement: bmjopen-2020-037319.draft_revisions.pdf [file bmjopen-2020-037319.draft_revisions.pdf]

# BMJ Open

BMJ Open is committed to open peer review. As part of this commitment we make the peer review history of every article we publish publicly available.

When an article is published we post the peer reviewers' comments and the authors' responses online. We also post the versions of the paper that were used during peer review. These are the versions that the peer review comments apply to.

The versions of the paper that follow are the versions that were submitted during the peer review process. They are not the versions of record or the final published versions. They should not be cited or distributed as the published version of this manuscript.

BMJ Open is an open access journal and the full, final, typeset and author-corrected version of record of the manuscript is available on our site with no access controls, subscription charges or pay-per-view fees (<http://bmjopen.bmj.com>).

If you have any questions on BMJ Open's open peer review process please email [info.bmjopen@bmj.com](mailto:info.bmjopen@bmj.com)

# BMJ Open

## Cadaveric simulation vs standard training for postgraduate trauma & orthopaedic surgical trainees: protocol for the CAD:TRAUMA study multi-centre randomised controlled educational trial

|                               |                                                                                                                                                                                                                                                                                                                                                                                                                                              |
|-------------------------------|----------------------------------------------------------------------------------------------------------------------------------------------------------------------------------------------------------------------------------------------------------------------------------------------------------------------------------------------------------------------------------------------------------------------------------------------|
| Journal:                      | <i>BMJ Open</i>                                                                                                                                                                                                                                                                                                                                                                                                                              |
| Manuscript ID                 | bmjopen-2020-037319                                                                                                                                                                                                                                                                                                                                                                                                                          |
| Article Type:                 | Protocol                                                                                                                                                                                                                                                                                                                                                                                                                                     |
| Date Submitted by the Author: | 28-Jan-2020                                                                                                                                                                                                                                                                                                                                                                                                                                  |
| Complete List of Authors:     | James, Hannah; University of Warwick Warwick Medical School, Clinical Trials Unit; University Hospitals Coventry and Warwickshire NHS Trust, Trauma & Orthopaedic Surgery<br>Pattison, Giles; University Hospitals Coventry and Warwickshire NHS Trust, Trauma & Orthopaedic Surgery<br>Fisher, Joanne; University of Warwick Warwick Medical School, Clinical Trials Unit<br>Griffin, Damian; University of Warwick, Warwick Medical School |
| Keywords:                     | MEDICAL EDUCATION & TRAINING, ORTHOPAEDIC & TRAUMA SURGERY, Trauma management < ORTHOPAEDIC & TRAUMA SURGERY                                                                                                                                                                                                                                                                                                                                 |
|                               |                                                                                                                                                                                                                                                                                                                                                                                                                                              |

SCHOLARONE™  
Manuscripts

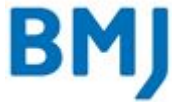

I, the Submitting Author has the right to grant and does grant on behalf of all authors of the Work (as defined in the below author licence), an exclusive licence and/or a non-exclusive licence for contributions from authors who are: i) UK Crown employees; ii) where BMJ has agreed a CC-BY licence shall apply, and/or iii) in accordance with the terms applicable for US Federal Government officers or employees acting as part of their official duties; on a worldwide, perpetual, irrevocable, royalty-free basis to BMJ Publishing Group Ltd ("BMJ") its licensees and where the relevant Journal is co-owned by BMJ to the co-owners of the Journal, to publish the Work in this journal and any other BMJ products and to exploit all rights, as set out in our [licence](#).

The Submitting Author accepts and understands that any supply made under these terms is made by BMJ to the Submitting Author unless you are acting as an employee on behalf of your employer or a postgraduate student of an affiliated institution which is paying any applicable article publishing charge ("APC") for Open Access articles. Where the Submitting Author wishes to make the Work available on an Open Access basis (and intends to pay the relevant APC), the terms of reuse of such Open Access shall be governed by a Creative Commons licence – details of these licences and which [Creative Commons](#) licence will apply to this Work are set out in our licence referred to above.

Other than as permitted in any relevant BMJ Author's Self Archiving Policies, I confirm this Work has not been accepted for publication elsewhere, is not being considered for publication elsewhere and does not duplicate material already published. I confirm all authors consent to publication of this Work and authorise the granting of this licence.

1  
2  
3 **Cadaveric simulation vs standard training for postgraduate trauma & orthopaedic surgical**  
4 **trainees: protocol for the CAD:TRAUMA study multi-centre randomised controlled**  
5 **educational trial**  
6  
7  
8  
9

10  
11  
12  
13  
14  
15  
16  
17  
18  
19  
20 Hannah K James<sup>1,2</sup> h.smith.1@warwick.ac.uk  
21  
22

23  
24  
25 Giles T R Pattison<sup>2</sup> Giles.Pattison@uhcw.nhs.uk  
26  
27

28  
29  
30 Joanne D Fisher<sup>1</sup> Joanne.Fisher@warwick.ac.uk  
31  
32

33  
34  
35 Damian R Griffin<sup>1,2</sup> Damian.Griffin@warwick.ac.uk  
36  
37  
38  
39  
40  
41  
42  
43

- 44 1. Clinical Trials Unit, Warwick Medical School, Coventry, CV4 7HL  
45  
46 2. Department of Trauma & Orthopaedic Surgery, University Hospitals Coventry &  
47  
48 Warwickshire, Clifford Bridge Road, Coventry, CV2 2DX  
49  
50  
51

52  
53 Correspondence:  
54  
55

56  
57  
58 Dr HK James  
59  
60

1  
2  
3 Clinical Sciences Research Laboratories

4  
5  
6 Clinical Sciences Building

7  
8 University Hospital Coventry & Warwickshire

9  
10 Clifford Bridge Road

11  
12  
13 Coventry

14  
15 CV2 2DX

16  
17  
18  
19  
20 Tel 07786737479

21  
22  
23  
24  
25 Word Count 3,420

26  
27  
28  
29 Keywords

30  
31  
32  
33  
34 Education, Training, Simulation

35  
36  
37  
38  
39 Abstract

40  
41  
42  
43  
44 **Introduction**

45  
46  
47  
48  
49 The quantity and quality of surgical training in the UK has been negatively affected by  
50  
51 reduced working hours and NHS financial pressures. Traditionally surgical training has  
52  
53 occurred by the master-apprentice model involving a process of graduated responsibility, but  
54  
55 a modern alternative is to use simulation for the early stages of training. It is not known if  
56  
57 simulation training for junior trainees can safeguard patients and improve clinical outcomes.  
58  
59  
60

1  
2  
3 This paper details the protocol for a multicentre randomised controlled educational trial of a  
4  
5  
6 cadaveric simulation training intervention versus standard training for junior postgraduate  
7  
8  
9 orthopaedic surgeons-in-training. This is the first study to assess the effect of cadaveric  
10  
11 simulation training on patient outcome.  
12  
13

## 14 15 **Methods and Analysis**

16  
17  
18  
19  
20 We will recruit postgraduate orthopaedic surgeons-in-training in the first three years (of  
21  
22  
23 eight) of the specialist training programme. Participants will be block randomised and  
24  
25  
26 allocated to either cadaveric simulation or standard 'on-the-job' training, learning three  
27  
28  
29 common orthopaedic procedures, each of which is a sub-study within the trial. The  
30  
31  
32 procedures are 1) Dynamic Hip Screw(DHS), 2) hemiarthroplasty and 3) ankle fracture  
33  
34  
35 fixation. These procedures have been selected as they are very common procedures which  
36  
37  
38 are routinely performed by junior surgeons-in-training. A pragmatic approach to sample size  
39  
40  
41 is taken in lieu of a formal power calculation as this is novel exploratory work with no a priori  
42  
43  
44 estimate of effect size to reference. The primary outcome measure is the technical success  
45  
46  
47 of the surgery performed on patients by the participating surgeons-in-training during the  
48  
49  
50 follow-up period for the three sub-study procedures, as measured by the implant position on  
51  
52  
53 the post-operative radiograph. The secondary outcome measures are procedure time, post-  
54  
55  
56 operative complication rate and patient health state at 4 months post-operation (EQ-5D –  
57  
58  
59 substudies 1 and 2 only).  
60

## 61 62 63 **Ethics, registration and dissemination**

1  
2  
3 National research ethics approval was granted for this study (15/WM/0464). Confidentiality  
4  
5  
6 Advisory Group approval was granted for accessing radiographic and outcome data without  
7  
8 patient consent on 27 February 2017 (16/CAG/0125). The results of this trial will be  
9  
10 submitted to a peer-reviewed journal and will inform educational and clinical practice.  
11  
12  
13  
14

#### 15 **Trial registration number**

16  
17  
18  
19  
20 ISRCTN20431944; Pre-results

21  
22  
23 Protocol version V\_P\_1.1  
24  
25  
26  
27  
28  
29

#### 30 Article Summary

31  
32  
33  
34  
35 Strengths and limitations of this study:

- 36  
37 • Surgeons-in-training should not be doing operations for the first time on living  
38 patients.  
39  
40  
41  
42  
43
- 44 • Simulation using deceased human bodies may be a good way to train novice  
45 surgeons at the early stages of learning, until they are competent enough to operate  
46 on real patients.  
47  
48  
49
- 50  
51 • This is the first randomised trial assessing the impact of a cadaveric simulation  
52 intervention on patient outcomes  
53  
54  
55  
56  
57  
58  
59  
60

- We cannot do a power calculation as this is novel work and we do not know what the effect size is likely to be
- Sample size is limited by the capacity of the surgical training centre

## Introduction

It is imperative that surgeons are trained to a high standard, so they can perform safe and effective operations for patients. The quality and quantity of surgical training in the UK is currently under threat from a 'perfect storm' of factors(1). These include reduced working hours(2, 3), shift based working patterns(4) with the loss of the traditional surgical firm, and a move to expedite training and shorten specialist programmes(5, 6). This is set within a climate of unprecedented financial austerity in the NHS and ever increasing service pressures.

Simulation offers a solution to some of these challenges by moving the early part of the surgical learning curve away from patients into a controlled environment, where skills can be rapidly acquired and competency can be assessed before trainees are released into clinical practice(7). Simulation is also potentially a very efficient way of training, as large numbers of



1  
2  
3 trainees can be trained simultaneously, at an intensity not feasible in the clinical environment  
4  
5  
6 due to competing service demands.  
7  
8  
9

10 Cadaveric simulation - training using deceased, preserved or fresh human bodies - is a  
11 particularly promising modality for training. It offers a highly realistic 'high fidelity' simulation  
12 where surgical anatomy is represented as in life, including soft tissues and neurovascular  
13 relationships(8, 9). This allows for a much more realistic simulated operation than would be  
14 possible on a plastic model or virtual reality simulator. In addition to the superior anatomic  
15 and tactile (haptic) properties of cadavers, the whole operating theatre environment can be  
16 simulated, including (but not limited to) surgical dress, draping, instrumentation and  
17 multidisciplinary team. This 'whole dress rehearsal' for surgery may enhance development of  
18 non-technical skills in addition to the technical operative surgical skills(10).  
19  
20  
21  
22  
23  
24  
25  
26  
27  
28  
29  
30  
31  
32  
33  
34  
35  
36  
37  
38  
39  
40  
41  
42  
43  
44  
45  
46  
47  
48  
49  
50  
51  
52  
53  
54  
55  
56  
57  
58  
59  
60

There is abundant low quality evidence showing cadaveric simulation may induce short term  
skill improvement as measured by subjective and behavioural metrics, but there is a lack of  
high quality, quantitative evidence that skills learnt in cadaveric simulation can transfer to the  
workplace, leading to improved outcomes for patients(8).

Our trial attempts to address this evidence deficit, and is both topical and timely.

### Good Clinical Practice

1  
2  
3 This trial will be undertaken in compliance with Good Practice Guidelines, complying with the  
4  
5 Declaration of Helsinki and UK Legislation. Warwick standard operating procedures (SOPs)  
6  
7  
8 will be followed.  
9

### 10 11 12 13 Consolidated Standards of Reporting Trials 14

15  
16  
17  
18 The results of the trial will be reported in line with the Consolidated Standard of Reporting  
19  
20 (CONSORT) statement(11). This protocol has been written according to the SPIRIT  
21  
22 reporting guidelines(12).  
23  
24  
25

### 26 27 Aim 28

29  
30  
31  
32 The aim is to determine which of the two surgical training strategies for junior orthopaedic  
33  
34 surgeons-in-training leads to the best patient outcomes for three common procedures.  
35  
36  
37  
38  
39  
40  
41  
42  
43

### 44 Objectives 45

- 46  
47  
48  
49 1. To assess the impact of a cadaveric simulation training intervention on the patient  
50  
51 outcome of operations performed by junior orthopaedic surgeons-in-training  
52
- 53  
54 2. To define the early learning curve of DHS, Hemiarthroplasty and ankle fracture  
55  
56 fixation  
57
- 58  
59 3. To explore the feasibility of using post-operative x-rays to assess technical skill  
60

## Methods and Analysis

### Study design

This is a UK multicentre, two-arm, group parallel randomised controlled educational trial

### Sample size

This trial is the first attempt to objectively measure transfer of open operative skills from cadaveric simulation into the workplace using patient-based outcome measures. There is no available estimate of effect size to reference against a priori in determining sample size, therefore a pragmatic approach to sample size will be taken in lieu of a formal power calculation. The surgical training centre can accommodate 16 delegates at one time and financial resources permitted one iteration of the cadaveric training course. Our maximum sample size is therefore 16 participants in each arm of the study

## Outcome measures

### A) Radiographic outcomes

1  
2  
3 The radiographs will be obtained electronically from hospital servers and the implant position  
4  
5 measured manually using computer software. The operations will be identified  
6  
7 retrospectively by access to the participating surgeons' electronic logbooks. The  
8  
9 measurements vary by operation type and are defined as follows.  
10  
11  
12  
13  
14

### 15 **Sub-study 1: Dynamic Hip Screw**

- 16  
17  
18  
19  
20 1. Primary Outcome
- 21  
22     ▪ Tip-Apex distance (in mm)
- 23  
24 2. Secondary Outcomes (in order of importance)
- 25  
26     ▪ Lag screw position in the femoral head (defined by Cleveland Zones)
  - 27  
28     ▪ Plate flush to lateral femoral cortex (binary Y/N)
  - 29  
30     ▪ 8 cortex hold for plate screws (binary Y/N)
- 31  
32  
33  
34  
35  
36

### 37 **Sub- study 2: Hemiarthroplasty**

- 38  
39  
40  
41 1. Primary Outcome
- 42  
43     ▪ Leg length discrepancy (mm)
- 44  
45 2. Secondary Outcomes (in order of importance)
- 46  
47     ▪ Femoral stem alignment (degrees off neutral)
  - 48  
49     ▪ Cement mantle quality (Barrack grade score)
  - 50  
51     ▪ Femoral offset change relative to native hip (mm)
- 52  
53  
54  
55  
56  
57

### 58 **Sub- study 3: Ankle fracture fixation**

1  
2  
3  
4  
5  
6 1. Primary Outcome  
7

- 8       ▪ Medial clear space (mm)  
9

10 2. Secondary Outcomes  
11

- 12       ▪ Lateral malleolar displacement (mm)  
13  
14       ▪ Tibiofibular clear space (mm)  
15  
16       ▪ Talocrural angle (degrees)  
17  
18       ▪ Medial malleolar displacement (mm)  
19  
20  
21  
22  
23  
24  
25  
26  
27

28 B) Clinical Outcomes  
29  
30  
31

32 The clinical outcome measures for sub-studies 1-3 are;  
33  
34  
35  
36

37 1) Procedure Time  
38  
39  
40  
41

42 Defined as knife-to-skin/surgical start time to wound closure/surgical stop time. These will be  
43 obtained from hospital theatre management systems. Procedure time has been chosen as  
44 an outcome measure as there is evidence in the literature that procedure time is inversely  
45 related to experience, and so can be used as a surrogate measure of technical  
46 proficiency(13)  
47  
48  
49  
50  
51  
52

53 2) Intra-operative radiation dose to patient  
54  
55  
56  
57  
58  
59  
60

1  
2  
3 Defined as time under fluoroscopy (seconds) and radiation dose (mGym2). There is  
4  
5 evidence that with increasing experience and skill, surgeons use less intra-operative x-rays  
6  
7 to adjust the position of the fracture and implant(13). Hemiarthroplasty does not require  
8  
9 fluoroscopy so this will not be used as an outcome measure for sub-study 2.  
10  
11  
12  
13  
14

### 15 3) Post-operative complication rate

16  
17  
18  
19  
20 The complications of interest are the acute post-operative complications during the inpatient  
21  
22 admission. These will be sub-categorised as acute medical complications (hospital acquired  
23  
24 pneumonia, renal complications, cardiac complications, DVT/PE) and surgical complications  
25  
26 (wound infection, wound dehiscence, metalwork failure, deep infection).  
27  
28  
29  
30  
31

### 32 4) Health state at 4 months post-operation (EQ-5D)

33  
34  
35  
36  
37 Health state at 4-months post-operation will be measured using EQ-5D, which is a  
38  
39 standardized instrument measuring generic health status, which has been widely validated  
40  
41 in clinical trials. This data is being collected separately as part of the WHiTE comprehensive  
42  
43 cohort study of hip fracture patients (ISRCTN63982700) and reported elsewhere(14). EQ-5D  
44  
45 will be used for sub-studies 1 and 2 only as these involve hip fractures.  
46  
47  
48  
49  
50  
51  
52

## 53 Screening and eligibility

54  
55  
56  
57  
58  
59  
60

1  
2  
3 Orthopaedic surgeons-in-training in their first, second or third specialist training year in the  
4  
5 West Midlands Workforce Deanery will be eligible to participate in the trial. Eligible trainees  
6  
7 will be identified by liaison with the training programme directors for Trauma & Orthopaedic  
8  
9 surgery in the three West Midlands schools; Warwick, Birmingham and Oswestry. An  
10  
11 invitation email will be sent to all eligible trainees by programme administrators at the  
12  
13 deanery.  
14  
15  
16  
17  
18  
19  
20  
21  
22

#### 23 Inclusion criteria

- 24  
25  
26  
27 1) Trauma & Orthopaedic surgeon-in-training in West Midlands school  
28  
29 (Warwick/Birmingham/Oswestry)  
30  
31  
32 2) In specialty training year 1-3  
33  
34  
35 3) Willing and able to attend a two-day cadaveric simulation training course at the West  
36  
37 Midlands Surgical Training Centre, Coventry  
38  
39  
40

#### 41 Exclusion criteria

- 42  
43  
44  
45  
46 1) Unavailable on course dates  
47  
48  
49  
50  
51  
52

#### 53 Consent

54  
55  
56  
57  
58 Surgeon participants:  
59  
60

1  
2  
3  
4  
5  
6 Potential study participants will be provided with written and verbal information about the  
7  
8 study. Consent will be obtained by the trial team. The right to refuse participation without  
9  
10 giving reasons will be fully respected, and enrolled participants will be free to withdraw from  
11  
12 the study at any time without reason, and without prejudice to their training. All participants  
13  
14 will be provided with the contact information of a team member who can provide further  
15  
16 information about the study. All participants who are allocated to the control group will have  
17  
18 the opportunity to undertake the cadaveric simulation training intervention at the end of the  
19  
20 study follow-up. This provision is being offered so that the control group are not  
21  
22 disadvantaged in their access to educational opportunity by virtue of being randomised to  
23  
24 the control group.  
25  
26  
27  
28  
29  
30  
31

32 Patients whose operations are assessed:  
33  
34  
35  
36

37 Patients who undergo an operation by a surgeon who is participating in the study will not be  
38  
39 separately consented to allow access to radiographs to assess their implant position or  
40  
41 clinical outcome data. Permission to access this information for the purposes of this study  
42  
43 without patient consent has been granted from the confidentiality advisory group  
44  
45 (16/CAG/0125). It is recognised that seeking consent from a group of primarily elderly, frail  
46  
47 patients to assess low risk, routine clinical data in a secure manner for a trial they are not  
48  
49 directly participating in would be unduly burdensome for the patients. All patient data will be  
50  
51 fully anonymised and handled securely in line with university data regulations.  
52  
53  
54  
55  
56  
57

58 Randomisation  
59  
60



1  
2  
3  
4  
5  
6 Participants will be randomised at the point of recruitment using block randomisation (block  
7  
8 size 4) to generate a random sequence list, to which participants will be assigned in the  
9  
10 order that they enter the study. The allocation sequence will be generated by a senior  
11  
12 medical statistician, participants will be enrolled by the trial team.  
13  
14  
15  
16  
17  
18  
19

#### 20 Postrandomisation withdrawals

21  
22  
23  
24  
25 Withdrawn participants will not be replaced.  
26  
27  
28  
29

#### 30 Study setting

31  
32  
33  
34 The study participants will be on training rotations within the regional hospitals of the West  
35  
36 Midlands during the study follow-up. The hospitals where trainees have been working, and  
37  
38 performing operations, during the study follow up will be identified from the participants  
39  
40 electronic surgical logbook records.  
41  
42  
43  
44  
45  
46  
47  
48

#### 49 Interventions

##### 50 51 52 53 Control group

54  
55  
56  
57  
58  
59  
60

1  
2  
3 The control group will undertake normal clinical training 'on-the-job' according to the master-  
4  
5 apprentice model, which is the current standard training practice.  
6  
7  
8  
9

#### 10 Intervention group (cadaveric simulation trained)

11  
12  
13  
14  
15 Participants allocated to the intervention group will receive an intensive, 2-day cadaveric  
16  
17 simulation training course at the start of the training year, where 4 common orthopaedic  
18  
19 surgical procedures will be taught (DHS, hemiarthroplasty, ankle fracture fixation and lower  
20  
21 limb fasciotomy). All intervention participants will receive training on all 4 procedures, which  
22  
23 will be considered separately in the analysis as individual sub-studies (as they have different  
24  
25 radiographic outcome measures). The fasciotomy procedure is included as a 'filler' to make  
26  
27 the course structure work, and chosen because it is an important high-stakes, anatomically  
28  
29 critical operation that is rarely performed by trainees. Outcomes related to the fasciotomy  
30  
31 procedure will not be collected or included in the analysis.  
32  
33  
34  
35  
36  
37  
38  
39  
40  
41

#### 42 The cadaveric simulation training course

43  
44  
45  
46 The course will be delivered in September at the start of the surgical training year (which  
47  
48 runs August to August). The course will take place at the West Midlands Surgical Training  
49  
50 Centre (WMSTC) at the University Hospital Coventry & Warwickshire (UHCW). The WMSTC  
51  
52 is a specialized wet-laboratory facility for delivering cadaveric training, and has an  
53  
54 experienced dedicated faculty to facilitate training delivery.  
55  
56  
57  
58  
59  
60

1  
2  
3  
4 The course will consist of two full days of teaching, with expert consultant faculty teaching on  
5  
6 fresh-frozen hemi-cadavers (waist-to-toe-tip). The participant:faculty ratio will be 2:1, and  
7  
8 participant:cadaver ratio will be 2:1. Each participant will undertake each of the four  
9  
10 procedures in their entirety as primary surgeon('skin-to-skin'), and will act as assistant when  
11  
12 their partner is the primary surgeon four times. Hence is participant is exposed to eight  
13  
14 procedures during the course:  
15  
16  
17  
18  
19  
20  
21  
22

23 The environment and psychological fidelity of the simulation will be maximised by providing;  
24  
25  
26

- 27 • Full surgical dress including masks, gloves, gowns and lead x-ray aprons
- 28 • The usual disposable surgical drapes
- 29 • Skin preparation (iodine solution) to prepare the surgical site, and participants and  
30  
31 faculty will be asked to observe the usual sterile field precautions as in real theatre  
32  
33 • Full surgical instrument trays, surgical implants and cement (for hemiarthroplasty) of  
34  
35 the same type as in real theatre will be used  
36  
37 • Image intensifier (mobile x-ray) will be available for intra-operative use  
38  
39 • Background noise levels and room temperature were maintained at what would  
40  
41 usually be expected in the operating theatre  
42  
43  
44  
45  
46  
47  
48  
49  
50

51 The simulated operating theatres will be set up within the WMSTC as two parallel  
52  
53 round-robin circuits. The two stations requiring x-ray use (DHS and ankle ORIF) will be set  
54  
55 up at the far end of the room to create a radiation zone and where appropriate, standard  
56  
57 precautions will be used. Careful consideration will be given to the optimum sequential use  
58  
59  
60

1  
2  
3 of the cadaveric specimens in planning the course structure. For example, it is necessary  
4 that the DHS station precedes the hemiarthroplasty station as it would obviously not be  
5 possible to perform a DHS operation when the femoral head had been removed. Similarly,  
6 the fasciotomy incisions would compromise the soft tissue envelope of the lower limb to a  
7 sufficient degree that the fidelity of the ankle ORIF station would be compromised. It is  
8 important to make the best and most efficient use of the cadaveric material, for both ethical  
9 and financial reasons.  
10  
11  
12  
13  
14  
15  
16  
17  
18  
19  
20  
21  
22  
23  
24

#### 25 Blinding

26  
27  
28  
29 The participants cannot be blinded to the type of training they receive, neither can the trial  
30 team in organising the cadaveric simulation training. The trial team will take no part in the  
31 training of participants. The assessment of radiographic images will be made blinded to  
32 group allocation.  
33  
34  
35  
36  
37  
38  
39  
40  
41

#### 42 Adverse event management

43  
44  
45  
46 In the unlikely event of a serious adverse event (SAE), the chief investigator will report to the  
47 sponsor (University of Warwick), ethics committee and project supervisors.  
48  
49  
50  
51  
52  
53

#### 54 Patient and public involvement

1  
2  
3 There was no direct patient or public involvement in the design of the study, although clearly  
4 training competent surgeons is in the public interest. There is qualitative work to be done  
5  
6 around this trial to better understand patient expectations of surgical training.  
7  
8  
9

#### 10 11 12 13 End of trial 14

15  
16  
17 The trial will end when data collection is complete. The trial will be stopped prematurely if  
18 required by the ethics committee, following recommendations from the sponsor, or if funding  
19  
20 for the study is withdrawn. The research ethics committee and confidentiality advisory group  
21  
22 will be notified in writing once the trial is complete.  
23  
24  
25  
26  
27  
28

#### 29 30 Trial Oversight 31

32  
33  
34 This trial is being undertaken as part of a doctoral research project (HKJ), and supervised by  
35  
36 three senior supervisors (DG, JF, GTRP). The supervisors will act as the trial management  
37  
38 group and steering committee. The trial is being conducted within a registered Clinical Trials  
39  
40 Unit, and will follow the CTU standard operating procedures.  
41  
42  
43  
44  
45

#### 46 47 Data Collection Plan 48

49  
50  
51 The operations performed by the participants will be identified by the surgeons' electronic  
52  
53 logbook. These will be extracted and anonymised to study identifier by the electronic  
54  
55 logbook data team, before being sent to the trial team. The data will include operation type,  
56  
57 date, hospital, hospital ID, patient age, American Society of Anaesthesiologists Grade and  
58  
59  
60

1  
2  
3 supervision code. The radiographs and clinical outcome data relating to these procedures  
4  
5 will then be obtained from the study sites via liaison with the respective Research &  
6  
7 Development Departments. Data will be entered into a secure trial database on a  
8  
9 professionally encrypted trial-specific computer, fully anonymised with only study identifiers.  
10  
11 Once data collection is complete, and prior to analysis, range checks for data values will be  
12  
13 undertaken, and data will be double checked on entry to the statistical software package.  
14  
15 The project supervisors will act as the data monitoring committee. No interim analysis will be  
16  
17 undertaken. The trial team and statistician will have access to the final trial dataset.  
18  
19  
20  
21  
22  
23  
24

#### 25 Statistical Analysis Plan

26  
27  
28  
29  
30 Baseline data will be summarised and compared between the two arms of the study. A  
31  
32 CONSORT chart showing the flow of participants through the study will be produced.  
33

34 The three taught procedures (substudies 1-3) will be analysed and reported individually.  
35  
36  
37

38  
39 The main analysis will investigate and report differences between the two groups with  
40  
41 respect to the implant positions (as measured from radiographs), the procedure times, the  
42  
43 intra-operative radiation dose to the patient, and patient outcomes, as measured by post-  
44  
45 operative complications and health state at 4 months post-operation (hip fractures only).  
46  
47  
48  
49

50  
51 Statistical tests will be two-sided and considered to demonstrate a significant difference  
52  
53 when  $p < 0.05$ . Temporal trends by group for implant position, procedure time and radiation  
54  
55 dose will be presented. Linear mixed effects models will be fitted to allow for within-surgeon  
56  
57 correlation between repeated observations (surgeon clustering as a random effect), and to  
58  
59  
60

1  
2  
3 adjust for important co-variables such as patient condition, age and surgeon experience.

4  
5  
6 These will be summarised by plotting individual learning curves, and then modelled to  
7  
8 estimate the overall learning curves for the two arms of the study.  
9

10  
11  
12  
13 Descriptive statistical analyses of between-group comparisons will be presented for  
14  
15 complication rate and health state, with temporal analysis of the latter being reported if  
16  
17 appropriate and feasible. The statistical analysis will be supervised and checked by a senior  
18  
19 medical statistician at Warwick University.  
20  
21  
22  
23  
24

25 In the event of missing data, statistician advice will be sought on multiple imputation.  
26  
27  
28  
29

### 30 Ethics and dissemination

31  
32  
33

34 Master-apprentice 'on-the-job' training for surgeons is the current training standard in the  
35  
36 UK(15, 16), and therefore the control arm of the study reflects usual practice. The cadaveric  
37  
38 simulation training intervention is a novel experimental intervention, but as it is an  
39  
40 educational intervention it does not expose trial participants to any substantial risks of harm.  
41  
42 The trial results will be reported in accordance with the CONSORT statement, and  
43  
44 disseminated through publication in peer reviewed journals and conferences. The results of  
45  
46 the trial will be presented to Health Education England and the Royal Surgical College. The  
47  
48 dataset, statistical code and technical appendices will be made available on request to the  
49  
50 corresponding author.  
51  
52  
53  
54

### 55 Funding

56  
57  
58  
59  
60

1  
2  
3  
4  
5  
6 This work was supported by Versus Arthritis grant number 20845  
7  
8  
9

10 Sponsor Contact Information  
11  
12  
13

14  
15 Mrs Jane Prewitt, University of Warwick, Research & Impact Services, University House,  
16  
17 Kirby Corner Road, Coventry, CV4 8UW  
18  
19

20  
21  
22  
23 wmsponsorship@warwick.ac.uk  
24  
25  
26  
27  
28

29 Declaration/Conflict of Interests  
30  
31

32 None to declare  
33  
34  
35  
36  
37  
38  
39  
40  
41  
42  
43  
44  
45  
46  
47  
48  
49  
50  
51  
52  
53  
54  
55  
56  
57  
58

59 References:  
60



1. Temple J. Time for Training. A Review of the impact of the European Working Time Directive on the quality of training. London: Medical Education England; 2010.
2. Maxwell AJ, Crocker M, Jones TL, Bhagawati D, Papadopoulos MC, Bell BA. Implementation of the European Working Time Directive in neurosurgery reduces continuity of care and training opportunities. *Acta Neurochirurgica*. 2010;152(7):1207-10.
3. Pickersgill T. The European working time directive for doctors in training. *BMJ*. 2001;323(7324):1266.
4. Marron C, Byrnes C, Kirk S. An EWTD-compliant shift rota decreases training opportunities. *Bulletin of the Royal College of Surgeons of England*. 2005;87(7):246-8.
5. Shape of Training. Report from the UK Shape of Training Steering Group (UKSTSG). General Medical Council; 2017.
6. Royal College of Surgeons of England. Improving Surgical Training - Trainee Prospectus. London: The Royal College of Surgeons; 2018.
7. Curran I. A Framework for Technology Enhanced Learning. London: Department of Health; 2011.
8. James H, Chapman A, Pattison G, Griffin DR, Fisher J. Current status of Cadaveric Simulation for surgical training: a Systematic Review. *British Journal of Surgery*. 2019.
9. Gilbody J, Prasthofer A, Ho K, Costa M. The use and effectiveness of cadaveric workshops in higher surgical training: a systematic review. *Annals of the Royal College of Surgeons of England*. 2011;93(5):347-56.
10. James H, Pattison G, Griffin D, Fisher J. How does cadaveric simulation influence learning in Orthopedic residents? *Journal of Surgical Education*. 2020;In Press.
11. Schulz KF, Altman DG, Moher D. CONSORT 2010 Statement: updated guidelines for reporting parallel group randomised trials. *BMJ*. 2010;340.
12. Chan A-W, Tetzlaff JM, Altman DG, Laupacis A, Gøtzsche PC, Krleža-Jerić K, et al. SPIRIT 2013 Statement: Defining Standard Protocol Items for Clinical Trials. *Annals of Internal Medicine*. 2013;158(3):200-7.
13. James H, Chapman A, Pattison G, Fisher JG, Griffin DR. Assessment of technical skill acquisition and operative competence in Trauma and Orthopaedic surgical training: A systematic review. *JBJs(Am) Reviews*. 2019.
14. Costa ML, Griffin XL, Achten J, Metcalfe D, Judge A, Pinedo-Villanueva R, et al. World Hip Trauma Evaluation (WHiTE): framework for embedded comprehensive cohort studies. *BMJ Open*. 2016;6(10):e011679.
15. Reznick RK, MacRae H. Teaching surgical skills--changes in the wind. *N Engl J Med*. 2006;355(25):2664-9.

1  
2  
3 16. Hargreaves DH, Bowditch MG, Griffin DR. On-the-job training for surgeons. 1 ed.  
4 London: The Royal Society of Medicine Press; 1997.  
5  
6  
7  
8  
9

10 Author Statement/Contributions  
11

12  
13 HKJ designed the study and wrote the manuscript

14 GTRP co-designed the study and the intervention and edited the manuscript

15  
16 JDF edited the manuscript, made a substantial contribution to the design and is lead  
17 supervisor for the qualitative part of the project

18  
19 DG co-designed the study, edited draft protocols and is lead supervisor for the  
20 quantitative part of the project  
21  
22

23  
24 Acknowledgements  
25

26  
27 None  
28  
29  
30  
31  
32  
33  
34  
35  
36  
37  
38  
39  
40  
41  
42  
43  
44  
45  
46  
47  
48  
49  
50  
51  
52  
53  
54  
55  
56  
57  
58  
59  
60

# Reporting checklist for protocol of a clinical trial.

Based on the SPIRIT guidelines.

## Instructions to authors

Complete this checklist by entering the page numbers from your manuscript where readers will find each of the items listed below.

Your article may not currently address all the items on the checklist. Please modify your text to include the missing information. If you are certain that an item does not apply, please write "n/a" and provide a short explanation.

Upload your completed checklist as an extra file when you submit to a journal.

In your methods section, say that you used the SPIRIT reporting guidelines, and cite them as:

Chan A-W, Tetzlaff JM, Altman DG, Laupacis A, Gøtzsche PC, Krleža-Jerić K, Hróbjartsson A, Mann H, Dickersin K, Berlin J, Doré C, Parulekar W, Summerskill W, Groves T, Schulz K, Sox H, Rockhold FW, Rennie D, Moher D. SPIRIT 2013 Statement: Defining standard protocol items for clinical trials. *Ann Intern Med.* 2013;158(3):200-207

|                                             |                     | Reporting Item                                                                                               | Page Number |
|---------------------------------------------|---------------------|--------------------------------------------------------------------------------------------------------------|-------------|
| <b>Administrative information</b>           |                     |                                                                                                              |             |
| Title                                       | <a href="#">#1</a>  | Descriptive title identifying the study design, population, interventions, and, if applicable, trial acronym | 1           |
| Trial registration                          | <a href="#">#2a</a> | Trial identifier and registry name. If not yet registered, name of intended registry                         | 3           |
| Trial registration: data set                | <a href="#">#2b</a> | All items from the World Health Organization Trial Registration Data Set                                     | 3           |
| Protocol version                            | <a href="#">#3</a>  | Date and version identifier                                                                                  | 3           |
| Funding                                     | <a href="#">#4</a>  | Sources and types of financial, material, and other support                                                  | 15          |
| Roles and responsibilities: contributorship | <a href="#">#5a</a> | Names, affiliations, and roles of protocol contributors                                                      | 1           |

|    |                           |                     |                                                                   |     |
|----|---------------------------|---------------------|-------------------------------------------------------------------|-----|
| 1  | Roles and                 | <a href="#">#5b</a> | Name and contact information for the trial sponsor                | 15  |
| 2  | responsibilities:         |                     |                                                                   |     |
| 3  | sponsor contact           |                     |                                                                   |     |
| 4  | information               |                     |                                                                   |     |
| 5  |                           |                     |                                                                   |     |
| 6  |                           |                     |                                                                   |     |
| 7  |                           |                     |                                                                   |     |
| 8  | Roles and                 | <a href="#">#5c</a> | Role of study sponsor and funders, if any, in study design;       | 14  |
| 9  | responsibilities:         |                     | collection, management, analysis, and interpretation of data;     |     |
| 10 | sponsor and funder        |                     | writing of the report; and the decision to submit the report for  |     |
| 11 |                           |                     | publication, including whether they will have ultimate            |     |
| 12 |                           |                     | authority over any of these activities                            |     |
| 13 |                           |                     |                                                                   |     |
| 14 |                           |                     |                                                                   |     |
| 15 |                           |                     |                                                                   |     |
| 16 | Roles and                 | <a href="#">#5d</a> | Composition, roles, and responsibilities of the coordinating      | 14  |
| 17 | responsibilities:         |                     | centre, steering committee, endpoint adjudication committee,      |     |
| 18 | committees                |                     | data management team, and other individuals or groups             |     |
| 19 |                           |                     | overseeing the trial, if applicable (see Item 21a for data        |     |
| 20 |                           |                     | monitoring committee)                                             |     |
| 21 |                           |                     |                                                                   |     |
| 22 |                           |                     |                                                                   |     |
| 23 |                           |                     |                                                                   |     |
| 24 | <b>Introduction</b>       |                     |                                                                   |     |
| 25 |                           |                     |                                                                   |     |
| 26 |                           |                     |                                                                   |     |
| 27 | Background and            | <a href="#">#6a</a> | Description of research question and justification for            | 1   |
| 28 | rationale                 |                     | undertaking the trial, including summary of relevant studies      |     |
| 29 |                           |                     | (published and unpublished) examining benefits and harms          |     |
| 30 |                           |                     | for each intervention                                             |     |
| 31 |                           |                     |                                                                   |     |
| 32 |                           |                     |                                                                   |     |
| 33 |                           |                     |                                                                   |     |
| 34 | Background and            | <a href="#">#6b</a> | Explanation for choice of comparators                             | 11  |
| 35 | rationale: choice of      |                     |                                                                   |     |
| 36 | comparators               |                     |                                                                   |     |
| 37 |                           |                     |                                                                   |     |
| 38 |                           |                     |                                                                   |     |
| 39 | Objectives                | <a href="#">#7</a>  | Specific objectives or hypotheses                                 | 5-6 |
| 40 |                           |                     |                                                                   |     |
| 41 | Trial design              | <a href="#">#8</a>  | Description of trial design including type of trial (eg, parallel | 5   |
| 42 |                           |                     | group, crossover, factorial, single group), allocation ratio, and |     |
| 43 |                           |                     | framework (eg, superiority, equivalence, non-inferiority,         |     |
| 44 |                           |                     | exploratory)                                                      |     |
| 45 |                           |                     |                                                                   |     |
| 46 |                           |                     |                                                                   |     |
| 47 |                           |                     |                                                                   |     |
| 48 | <b>Methods:</b>           |                     |                                                                   |     |
| 49 | <b>Participants,</b>      |                     |                                                                   |     |
| 50 | <b>interventions, and</b> |                     |                                                                   |     |
| 51 | <b>outcomes</b>           |                     |                                                                   |     |
| 52 |                           |                     |                                                                   |     |
| 53 |                           |                     |                                                                   |     |
| 54 |                           |                     |                                                                   |     |
| 55 | Study setting             | <a href="#">#9</a>  | Description of study settings (eg, community clinic, academic     | 10  |
| 56 |                           |                     | hospital) and list of countries where data will be collected.     |     |
| 57 |                           |                     | Reference to where list of study sites can be obtained            |     |
| 58 |                           |                     |                                                                   |     |
| 59 |                           |                     |                                                                   |     |
| 60 |                           |                     |                                                                   |     |

|    |                      |                      |                                                                                                                                                                                                                                                                                                                                                                                |                         |
|----|----------------------|----------------------|--------------------------------------------------------------------------------------------------------------------------------------------------------------------------------------------------------------------------------------------------------------------------------------------------------------------------------------------------------------------------------|-------------------------|
| 1  | Eligibility criteria | <a href="#">#10</a>  | Inclusion and exclusion criteria for participants. If applicable, eligibility criteria for study centres and individuals who will perform the interventions (eg, surgeons, psychotherapists)                                                                                                                                                                                   | 9                       |
| 2  |                      |                      |                                                                                                                                                                                                                                                                                                                                                                                |                         |
| 3  |                      |                      |                                                                                                                                                                                                                                                                                                                                                                                |                         |
| 4  |                      |                      |                                                                                                                                                                                                                                                                                                                                                                                |                         |
| 5  |                      |                      |                                                                                                                                                                                                                                                                                                                                                                                |                         |
| 6  | Interventions:       | <a href="#">#11a</a> | Interventions for each group with sufficient detail to allow replication, including how and when they will be administered                                                                                                                                                                                                                                                     | 11-13                   |
| 7  | description          |                      |                                                                                                                                                                                                                                                                                                                                                                                |                         |
| 8  |                      |                      |                                                                                                                                                                                                                                                                                                                                                                                |                         |
| 9  |                      |                      |                                                                                                                                                                                                                                                                                                                                                                                |                         |
| 10 |                      |                      |                                                                                                                                                                                                                                                                                                                                                                                |                         |
| 11 | Interventions:       | <a href="#">#11b</a> | Criteria for discontinuing or modifying allocated interventions for a given trial participant (eg, drug dose change in response to harms, participant request, or improving / worsening disease)                                                                                                                                                                               | N/A – educational trial |
| 12 | modifications        |                      |                                                                                                                                                                                                                                                                                                                                                                                |                         |
| 13 |                      |                      |                                                                                                                                                                                                                                                                                                                                                                                |                         |
| 14 |                      |                      |                                                                                                                                                                                                                                                                                                                                                                                |                         |
| 15 |                      |                      |                                                                                                                                                                                                                                                                                                                                                                                |                         |
| 16 |                      |                      |                                                                                                                                                                                                                                                                                                                                                                                |                         |
| 17 |                      |                      |                                                                                                                                                                                                                                                                                                                                                                                |                         |
| 18 | Interventions:       | <a href="#">#11c</a> | Strategies to improve adherence to intervention protocols, and any procedures for monitoring adherence (eg, drug tablet return; laboratory tests)                                                                                                                                                                                                                              | N/A – educational trial |
| 19 | adherence            |                      |                                                                                                                                                                                                                                                                                                                                                                                |                         |
| 20 |                      |                      |                                                                                                                                                                                                                                                                                                                                                                                |                         |
| 21 |                      |                      |                                                                                                                                                                                                                                                                                                                                                                                |                         |
| 22 |                      |                      |                                                                                                                                                                                                                                                                                                                                                                                |                         |
| 23 |                      |                      |                                                                                                                                                                                                                                                                                                                                                                                |                         |
| 24 | Interventions:       | <a href="#">#11d</a> | Relevant concomitant care and interventions that are permitted or prohibited during the trial                                                                                                                                                                                                                                                                                  | N/A – educational trial |
| 25 | concomitant care     |                      |                                                                                                                                                                                                                                                                                                                                                                                |                         |
| 26 |                      |                      |                                                                                                                                                                                                                                                                                                                                                                                |                         |
| 27 |                      |                      |                                                                                                                                                                                                                                                                                                                                                                                |                         |
| 28 |                      |                      |                                                                                                                                                                                                                                                                                                                                                                                |                         |
| 29 | Outcomes             | <a href="#">#12</a>  | Primary, secondary, and other outcomes, including the specific measurement variable (eg, systolic blood pressure), analysis metric (eg, change from baseline, final value, time to event), method of aggregation (eg, median, proportion), and time point for each outcome. Explanation of the clinical relevance of chosen efficacy and harm outcomes is strongly recommended | 6-7                     |
| 30 |                      |                      |                                                                                                                                                                                                                                                                                                                                                                                |                         |
| 31 |                      |                      |                                                                                                                                                                                                                                                                                                                                                                                |                         |
| 32 |                      |                      |                                                                                                                                                                                                                                                                                                                                                                                |                         |
| 33 |                      |                      |                                                                                                                                                                                                                                                                                                                                                                                |                         |
| 34 |                      |                      |                                                                                                                                                                                                                                                                                                                                                                                |                         |
| 35 |                      |                      |                                                                                                                                                                                                                                                                                                                                                                                |                         |
| 36 |                      |                      |                                                                                                                                                                                                                                                                                                                                                                                |                         |
| 37 |                      |                      |                                                                                                                                                                                                                                                                                                                                                                                |                         |
| 38 |                      |                      |                                                                                                                                                                                                                                                                                                                                                                                |                         |
| 39 |                      |                      |                                                                                                                                                                                                                                                                                                                                                                                |                         |
| 40 | Participant timeline | <a href="#">#13</a>  | Time schedule of enrolment, interventions (including any run-ins and washouts), assessments, and visits for participants. A schematic diagram is highly recommended (see Figure)                                                                                                                                                                                               | 11                      |
| 41 |                      |                      |                                                                                                                                                                                                                                                                                                                                                                                |                         |
| 42 |                      |                      |                                                                                                                                                                                                                                                                                                                                                                                |                         |
| 43 |                      |                      |                                                                                                                                                                                                                                                                                                                                                                                |                         |
| 44 |                      |                      |                                                                                                                                                                                                                                                                                                                                                                                |                         |
| 45 |                      |                      |                                                                                                                                                                                                                                                                                                                                                                                |                         |
| 46 |                      |                      |                                                                                                                                                                                                                                                                                                                                                                                |                         |
| 47 | Sample size          | <a href="#">#14</a>  | Estimated number of participants needed to achieve study objectives and how it was determined, including clinical and statistical assumptions supporting any sample size calculations                                                                                                                                                                                          | 6                       |
| 48 |                      |                      |                                                                                                                                                                                                                                                                                                                                                                                |                         |
| 49 |                      |                      |                                                                                                                                                                                                                                                                                                                                                                                |                         |
| 50 |                      |                      |                                                                                                                                                                                                                                                                                                                                                                                |                         |
| 51 |                      |                      |                                                                                                                                                                                                                                                                                                                                                                                |                         |
| 52 |                      |                      |                                                                                                                                                                                                                                                                                                                                                                                |                         |
| 53 |                      |                      |                                                                                                                                                                                                                                                                                                                                                                                |                         |
| 54 | Recruitment          | <a href="#">#15</a>  | Strategies for achieving adequate participant enrolment to reach target sample size                                                                                                                                                                                                                                                                                            | 8                       |
| 55 |                      |                      |                                                                                                                                                                                                                                                                                                                                                                                |                         |
| 56 |                      |                      |                                                                                                                                                                                                                                                                                                                                                                                |                         |
| 57 |                      |                      |                                                                                                                                                                                                                                                                                                                                                                                |                         |
| 58 |                      |                      |                                                                                                                                                                                                                                                                                                                                                                                |                         |
| 59 |                      |                      |                                                                                                                                                                                                                                                                                                                                                                                |                         |
| 60 |                      |                      |                                                                                                                                                                                                                                                                                                                                                                                |                         |

1 **Methods:**

2 **Assignment of**  
3 **interventions (for**  
4 **controlled trials)**  
5  
6

|    |                                          |                      |                                                                                                                                                                                                                                                                                                                                                          |                         |
|----|------------------------------------------|----------------------|----------------------------------------------------------------------------------------------------------------------------------------------------------------------------------------------------------------------------------------------------------------------------------------------------------------------------------------------------------|-------------------------|
| 7  | Allocation: sequence generation          | <a href="#">#16a</a> | Method of generating the allocation sequence (eg, computer-generated random numbers), and list of any factors for stratification. To reduce predictability of a random sequence, details of any planned restriction (eg, blocking) should be provided in a separate document that is unavailable to those who enrol participants or assign interventions | 10                      |
| 17 | Allocation concealment mechanism         | <a href="#">#16b</a> | Mechanism of implementing the allocation sequence (eg, central telephone; sequentially numbered, opaque, sealed envelopes), describing any steps to conceal the sequence until interventions are assigned                                                                                                                                                | 10                      |
| 24 | Allocation: implementation               | <a href="#">#16c</a> | Who will generate the allocation sequence, who will enrol participants, and who will assign participants to interventions                                                                                                                                                                                                                                | 10                      |
| 28 | Blinding (masking)                       | <a href="#">#17a</a> | Who will be blinded after assignment to interventions (eg, trial participants, care providers, outcome assessors, data analysts), and how                                                                                                                                                                                                                | 13                      |
| 34 | Blinding (masking): emergency unblinding | <a href="#">#17b</a> | If blinded, circumstances under which unblinding is permissible, and procedure for revealing a participant's allocated intervention during the trial                                                                                                                                                                                                     | N/A - educational trial |

39 **Methods: Data**  
40 **collection,**  
41 **management, and**  
42 **analysis**  
43  
44

|    |                                 |                      |                                                                                                                                                                                                                                                                                                                                                                                                              |    |
|----|---------------------------------|----------------------|--------------------------------------------------------------------------------------------------------------------------------------------------------------------------------------------------------------------------------------------------------------------------------------------------------------------------------------------------------------------------------------------------------------|----|
| 46 | Data collection plan            | <a href="#">#18a</a> | Plans for assessment and collection of outcome, baseline, and other trial data, including any related processes to promote data quality (eg, duplicate measurements, training of assessors) and a description of study instruments (eg, questionnaires, laboratory tests) along with their reliability and validity, if known. Reference to where data collection forms can be found, if not in the protocol | 14 |
| 57 | Data collection plan: retention | <a href="#">#18b</a> | Plans to promote participant retention and complete follow-up, including list of any outcome data to be collected for                                                                                                                                                                                                                                                                                        | 14 |

participants who discontinue or deviate from intervention protocols

|    |                            |                      |                                                                           |
|----|----------------------------|----------------------|---------------------------------------------------------------------------|
| 1  |                            |                      |                                                                           |
| 2  |                            |                      |                                                                           |
| 3  |                            |                      |                                                                           |
| 4  | Data management            | <a href="#">#19</a>  | Plans for data entry, coding, security, and storage, including 14         |
| 5  |                            |                      | any related processes to promote data quality (eg, double data            |
| 6  |                            |                      | entry; range checks for data values). Reference to where                  |
| 7  |                            |                      | details of data management procedures can be found, if not in             |
| 8  |                            |                      | the protocol                                                              |
| 9  |                            |                      |                                                                           |
| 10 |                            |                      |                                                                           |
| 11 |                            |                      |                                                                           |
| 12 | Statistics: outcomes       | <a href="#">#20a</a> | Statistical methods for analysing primary and secondary 14-15             |
| 13 |                            |                      | outcomes. Reference to where other details of the statistical             |
| 14 |                            |                      | analysis plan can be found, if not in the protocol                        |
| 15 |                            |                      |                                                                           |
| 16 |                            |                      |                                                                           |
| 17 | Statistics: additional     | <a href="#">#20b</a> | Methods for any additional analyses (eg, subgroup and 14-15               |
| 18 | analyses                   |                      | adjusted analyses)                                                        |
| 19 |                            |                      |                                                                           |
| 20 |                            |                      |                                                                           |
| 21 | Statistics: analysis       | <a href="#">#20c</a> | Definition of analysis population relating to protocol non- 15            |
| 22 | population and             |                      | adherence (eg, as randomised analysis), and any statistical               |
| 23 | missing data               |                      | methods to handle missing data (eg, multiple imputation)                  |
| 24 |                            |                      |                                                                           |
| 25 |                            |                      |                                                                           |
| 26 |                            |                      |                                                                           |
| 27 | <b>Methods: Monitoring</b> |                      |                                                                           |
| 28 |                            |                      |                                                                           |
| 29 | Data monitoring:           | <a href="#">#21a</a> | Composition of data monitoring committee (DMC); summary 14                |
| 30 | formal committee           |                      | of its role and reporting structure; statement of whether it is           |
| 31 |                            |                      | independent from the sponsor and competing interests; and                 |
| 32 |                            |                      | reference to where further details about its charter can be               |
| 33 |                            |                      | found, if not in the protocol. Alternatively, an explanation of           |
| 34 |                            |                      | why a DMC is not needed                                                   |
| 35 |                            |                      |                                                                           |
| 36 |                            |                      |                                                                           |
| 37 |                            |                      |                                                                           |
| 38 |                            |                      |                                                                           |
| 39 | Data monitoring:           | <a href="#">#21b</a> | Description of any interim analyses and stopping guidelines, 14           |
| 40 | interim analysis           |                      | including who will have access to these interim results and               |
| 41 |                            |                      | make the final decision to terminate the trial                            |
| 42 |                            |                      |                                                                           |
| 43 |                            |                      |                                                                           |
| 44 | Harms                      | <a href="#">#22</a>  | Plans for collecting, assessing, reporting, and managing N/A –            |
| 45 |                            |                      | solicited and spontaneously reported adverse events and other educational |
| 46 |                            |                      | unintended effects of trial interventions or trial conduct trial          |
| 47 |                            |                      |                                                                           |
| 48 |                            |                      |                                                                           |
| 49 | Auditing                   | <a href="#">#23</a>  | Frequency and procedures for auditing trial conduct, if any, N/A –        |
| 50 |                            |                      | and whether the process will be independent from educational              |
| 51 |                            |                      | investigators and the sponsor trial                                       |
| 52 |                            |                      |                                                                           |
| 53 |                            |                      |                                                                           |
| 54 |                            |                      |                                                                           |
| 55 | <b>Ethics and</b>          |                      |                                                                           |
| 56 | <b>dissemination</b>       |                      |                                                                           |
| 57 |                            |                      |                                                                           |
| 58 |                            |                      |                                                                           |
| 59 |                            |                      |                                                                           |
| 60 |                            |                      |                                                                           |

|    |                                             |                      |                                                                                                                                                                                                                                                                                     |                         |
|----|---------------------------------------------|----------------------|-------------------------------------------------------------------------------------------------------------------------------------------------------------------------------------------------------------------------------------------------------------------------------------|-------------------------|
| 1  | Research ethics approval                    | <a href="#">#24</a>  | Plans for seeking research ethics committee / institutional review board (REC / IRB) approval                                                                                                                                                                                       | 3                       |
| 2  |                                             |                      |                                                                                                                                                                                                                                                                                     |                         |
| 3  |                                             |                      |                                                                                                                                                                                                                                                                                     |                         |
| 4  | Protocol amendments                         | <a href="#">#25</a>  | Plans for communicating important protocol modifications (eg, changes to eligibility criteria, outcomes, analyses) to relevant parties (eg, investigators, REC / IRBs, trial participants, trial registries, journals, regulators)                                                  | N/A – educational trial |
| 5  |                                             |                      |                                                                                                                                                                                                                                                                                     |                         |
| 6  |                                             |                      |                                                                                                                                                                                                                                                                                     |                         |
| 7  |                                             |                      |                                                                                                                                                                                                                                                                                     |                         |
| 8  |                                             |                      |                                                                                                                                                                                                                                                                                     |                         |
| 9  |                                             |                      |                                                                                                                                                                                                                                                                                     |                         |
| 10 |                                             |                      |                                                                                                                                                                                                                                                                                     |                         |
| 11 | Consent or assent                           | <a href="#">#26a</a> | Who will obtain informed consent or assent from potential trial participants or authorised surrogates, and how (see Item 32)                                                                                                                                                        | 9                       |
| 12 |                                             |                      |                                                                                                                                                                                                                                                                                     |                         |
| 13 |                                             |                      |                                                                                                                                                                                                                                                                                     |                         |
| 14 |                                             |                      |                                                                                                                                                                                                                                                                                     |                         |
| 15 |                                             |                      |                                                                                                                                                                                                                                                                                     |                         |
| 16 |                                             |                      |                                                                                                                                                                                                                                                                                     |                         |
| 17 | Consent or assent: ancillary studies        | <a href="#">#26b</a> | Additional consent provisions for collection and use of participant data and biological specimens in ancillary studies, if applicable                                                                                                                                               | N/A – educational trial |
| 18 |                                             |                      |                                                                                                                                                                                                                                                                                     |                         |
| 19 |                                             |                      |                                                                                                                                                                                                                                                                                     |                         |
| 20 |                                             |                      |                                                                                                                                                                                                                                                                                     |                         |
| 21 |                                             |                      |                                                                                                                                                                                                                                                                                     |                         |
| 22 | Confidentiality                             | <a href="#">#27</a>  | How personal information about potential and enrolled participants will be collected, shared, and maintained in order to protect confidentiality before, during, and after the trial                                                                                                | 14                      |
| 23 |                                             |                      |                                                                                                                                                                                                                                                                                     |                         |
| 24 |                                             |                      |                                                                                                                                                                                                                                                                                     |                         |
| 25 |                                             |                      |                                                                                                                                                                                                                                                                                     |                         |
| 26 |                                             |                      |                                                                                                                                                                                                                                                                                     |                         |
| 27 | Declaration of interests                    | <a href="#">#28</a>  | Financial and other competing interests for principal investigators for the overall trial and each study site                                                                                                                                                                       | 16                      |
| 28 |                                             |                      |                                                                                                                                                                                                                                                                                     |                         |
| 29 |                                             |                      |                                                                                                                                                                                                                                                                                     |                         |
| 30 |                                             |                      |                                                                                                                                                                                                                                                                                     |                         |
| 31 | Data access                                 | <a href="#">#29</a>  | Statement of who will have access to the final trial dataset, and disclosure of contractual agreements that limit such access for investigators                                                                                                                                     | 14                      |
| 32 |                                             |                      |                                                                                                                                                                                                                                                                                     |                         |
| 33 |                                             |                      |                                                                                                                                                                                                                                                                                     |                         |
| 34 |                                             |                      |                                                                                                                                                                                                                                                                                     |                         |
| 35 |                                             |                      |                                                                                                                                                                                                                                                                                     |                         |
| 36 |                                             |                      |                                                                                                                                                                                                                                                                                     |                         |
| 37 | Ancillary and post trial care               | <a href="#">#30</a>  | Provisions, if any, for ancillary and post-trial care, and for compensation to those who suffer harm from trial participation                                                                                                                                                       | N/A – educational trial |
| 38 |                                             |                      |                                                                                                                                                                                                                                                                                     |                         |
| 39 |                                             |                      |                                                                                                                                                                                                                                                                                     |                         |
| 40 |                                             |                      |                                                                                                                                                                                                                                                                                     |                         |
| 41 |                                             |                      |                                                                                                                                                                                                                                                                                     |                         |
| 42 | Dissemination policy: trial results         | <a href="#">#31a</a> | Plans for investigators and sponsor to communicate trial results to participants, healthcare professionals, the public, and other relevant groups (eg, via publication, reporting in results databases, or other data sharing arrangements), including any publication restrictions | 15                      |
| 43 |                                             |                      |                                                                                                                                                                                                                                                                                     |                         |
| 44 |                                             |                      |                                                                                                                                                                                                                                                                                     |                         |
| 45 |                                             |                      |                                                                                                                                                                                                                                                                                     |                         |
| 46 |                                             |                      |                                                                                                                                                                                                                                                                                     |                         |
| 47 |                                             |                      |                                                                                                                                                                                                                                                                                     |                         |
| 48 |                                             |                      |                                                                                                                                                                                                                                                                                     |                         |
| 49 |                                             |                      |                                                                                                                                                                                                                                                                                     |                         |
| 50 | Dissemination policy: authorship            | <a href="#">#31b</a> | Authorship eligibility guidelines and any intended use of professional writers                                                                                                                                                                                                      | 15                      |
| 51 |                                             |                      |                                                                                                                                                                                                                                                                                     |                         |
| 52 |                                             |                      |                                                                                                                                                                                                                                                                                     |                         |
| 53 |                                             |                      |                                                                                                                                                                                                                                                                                     |                         |
| 54 | Dissemination policy: reproducible research | <a href="#">#31c</a> | Plans, if any, for granting public access to the full protocol, participant-level dataset, and statistical code                                                                                                                                                                     | N/A                     |
| 55 |                                             |                      |                                                                                                                                                                                                                                                                                     |                         |
| 56 |                                             |                      |                                                                                                                                                                                                                                                                                     |                         |
| 57 |                                             |                      |                                                                                                                                                                                                                                                                                     |                         |

## Appendices



|    |                      |                     |                                                               |             |
|----|----------------------|---------------------|---------------------------------------------------------------|-------------|
| 1  | Informed consent     | <a href="#">#32</a> | Model consent form and other related documentation given to   | Appendix    |
| 2  | materials            |                     | participants and authorised surrogates                        |             |
| 3  |                      |                     |                                                               |             |
| 4  |                      |                     |                                                               |             |
| 5  | Biological specimens | <a href="#">#33</a> | Plans for collection, laboratory evaluation, and storage of   | N/A –       |
| 6  |                      |                     | biological specimens for genetic or molecular analysis in the | educational |
| 7  |                      |                     | current trial and for future use in ancillary studies, if     | trial       |
| 8  |                      |                     | applicable                                                    |             |
| 9  |                      |                     |                                                               |             |
| 10 |                      |                     |                                                               |             |

11 None The SPIRIT checklist is distributed under the terms of the Creative Commons Attribution License CC-  
12 BY-ND 3.0. This checklist can be completed online using <https://www.goodreports.org/>, a tool made by the  
13 [EQUATOR Network](#) in collaboration with [Penelope.ai](#)  
14  
15

16  
17  
18  
19  
20  
21  
22  
23  
24  
25  
26  
27  
28  
29  
30  
31  
32  
33  
34  
35  
36  
37  
38  
39  
40  
41  
42  
43  
44  
45  
46  
47  
48  
49  
50  
51  
52  
53  
54  
55  
56  
57  
58  
59  
60

For peer review only

# BMJ Open

## Cadaveric simulation vs standard training for postgraduate trauma & orthopaedic surgical trainees: protocol for the CAD:TRAUMA study multi-centre randomised controlled educational trial

|                                 |                                                                                                                                                                                                                                                                                                                                                                                                                                              |
|---------------------------------|----------------------------------------------------------------------------------------------------------------------------------------------------------------------------------------------------------------------------------------------------------------------------------------------------------------------------------------------------------------------------------------------------------------------------------------------|
| Journal:                        | <i>BMJ Open</i>                                                                                                                                                                                                                                                                                                                                                                                                                              |
| Manuscript ID                   | bmjopen-2020-037319.R1                                                                                                                                                                                                                                                                                                                                                                                                                       |
| Article Type:                   | Protocol                                                                                                                                                                                                                                                                                                                                                                                                                                     |
| Date Submitted by the Author:   | 04-May-2020                                                                                                                                                                                                                                                                                                                                                                                                                                  |
| Complete List of Authors:       | James, Hannah; University of Warwick Warwick Medical School, Clinical Trials Unit; University Hospitals Coventry and Warwickshire NHS Trust, Trauma & Orthopaedic Surgery<br>Pattison, Giles; University Hospitals Coventry and Warwickshire NHS Trust, Trauma & Orthopaedic Surgery<br>Fisher, Joanne; University of Warwick Warwick Medical School, Clinical Trials Unit<br>Griffin, Damian; University of Warwick, Warwick Medical School |
| <b>Primary Subject Heading</b>: | Medical education and training                                                                                                                                                                                                                                                                                                                                                                                                               |
| Secondary Subject Heading:      | Surgery                                                                                                                                                                                                                                                                                                                                                                                                                                      |
| Keywords:                       | MEDICAL EDUCATION & TRAINING, ORTHOPAEDIC & TRAUMA SURGERY, Trauma management < ORTHOPAEDIC & TRAUMA SURGERY                                                                                                                                                                                                                                                                                                                                 |
|                                 |                                                                                                                                                                                                                                                                                                                                                                                                                                              |

SCHOLARONE™  
Manuscripts



I, the Submitting Author has the right to grant and does grant on behalf of all authors of the Work (as defined in the below author licence), an exclusive licence and/or a non-exclusive licence for contributions from authors who are: i) UK Crown employees; ii) where BMJ has agreed a CC-BY licence shall apply, and/or iii) in accordance with the terms applicable for US Federal Government officers or employees acting as part of their official duties; on a worldwide, perpetual, irrevocable, royalty-free basis to BMJ Publishing Group Ltd ("BMJ") its licensees and where the relevant Journal is co-owned by BMJ to the co-owners of the Journal, to publish the Work in this journal and any other BMJ products and to exploit all rights, as set out in our [licence](#).

The Submitting Author accepts and understands that any supply made under these terms is made by BMJ to the Submitting Author unless you are acting as an employee on behalf of your employer or a postgraduate student of an affiliated institution which is paying any applicable article publishing charge ("APC") for Open Access articles. Where the Submitting Author wishes to make the Work available on an Open Access basis (and intends to pay the relevant APC), the terms of reuse of such Open Access shall be governed by a Creative Commons licence – details of these licences and which [Creative Commons](#) licence will apply to this Work are set out in our licence referred to above.

Other than as permitted in any relevant BMJ Author's Self Archiving Policies, I confirm this Work has not been accepted for publication elsewhere, is not being considered for publication elsewhere and does not duplicate material already published. I confirm all authors consent to publication of this Work and authorise the granting of this licence.

1  
2  
3 **Cadaveric simulation vs standard training for postgraduate trauma & orthopaedic surgical**  
4 **trainees: protocol for the CAD:TRAUMA study multi-centre randomised controlled**  
5 **educational trial**  
6  
7  
8  
9

10  
11  
12  
13  
14  
15  
16  
17  
18  
19  
20 Hannah K James<sup>1,2</sup> h.smith.1@warwick.ac.uk  
21

22  
23  
24  
25 Giles T R Pattison<sup>2</sup> Giles.Pattison@uhcw.nhs.uk  
26

27  
28  
29  
30 Joanne D Fisher<sup>1</sup> Joanne.Fisher@warwick.ac.uk  
31

32  
33  
34  
35 Damian R Griffin<sup>1,2</sup> Damian.Griffin@warwick.ac.uk  
36

- 37  
38  
39  
40  
41  
42  
43  
44 1. Clinical Trials Unit, Warwick Medical School, Coventry, CV4 7HL  
45  
46 2. Department of Trauma & Orthopaedic Surgery, University Hospitals Coventry &  
47  
48 Warwickshire, Clifford Bridge Road, Coventry, CV2 2DX  
49  
50

51  
52  
53 Correspondence:

54  
55  
56  
57  
58 Dr HK James  
59  
60

1  
2  
3 Clinical Sciences Research Laboratories

4  
5  
6 Clinical Sciences Building

7  
8 University Hospital Coventry & Warwickshire

9  
10 Clifford Bridge Road

11  
12  
13 Coventry

14  
15 CV2 2DX

16  
17  
18  
19  
20 Tel 07786737479

21  
22  
23  
24  
25 Word Count 3,420

26  
27  
28  
29 Keywords

30  
31  
32  
33  
34 Education, Training, Simulation

35  
36  
37  
38  
39 Abstract

40  
41  
42  
43  
44 **Introduction**

45  
46  
47  
48  
49 The quantity and quality of surgical training in the UK has been negatively affected by  
50  
51 reduced working hours and NHS financial pressures. Traditionally surgical training has  
52  
53 occurred by the master-apprentice model involving a process of graduated responsibility, but  
54  
55 a modern alternative is to use simulation for the early stages of training. It is not known if  
56  
57 simulation training for junior trainees can safeguard patients and improve clinical outcomes.  
58  
59  
60

1  
2  
3 This paper details the protocol for a multicentre randomised controlled educational trial of a  
4  
5  
6 cadaveric simulation training intervention versus standard training for junior postgraduate  
7  
8 orthopaedic surgeons-in-training. This is the first study to assess the effect of cadaveric  
9  
10 simulation training for open surgery on patient outcome. The feasibility of delivering  
11  
12 cadaveric training, use of radiographic and clinical outcome measures to assess impact and  
13  
14 the challenges of upscaling provision will be explored.  
15  
16  
17  
18  
19

## 20 **Methods and Analysis**

21  
22  
23  
24  
25 We will recruit postgraduate orthopaedic surgeons-in-training in the first three years (of  
26  
27 eight) of the specialist training programme. Participants will be block randomised and  
28  
29 allocated to either cadaveric simulation or standard 'on-the-job' training, learning three  
30  
31 common orthopaedic procedures, each of which is a sub-study within the trial. The  
32  
33 procedures are 1) Dynamic Hip Screw(DHS), 2) hemiarthroplasty and 3) ankle fracture  
34  
35 fixation. These procedures have been selected as they are very common procedures which  
36  
37 are routinely performed by junior surgeons-in-training. A pragmatic approach to sample size  
38  
39 is taken in lieu of a formal power calculation as this is novel exploratory work with no a priori  
40  
41 estimate of effect size to reference. The primary outcome measure is the technical success  
42  
43 of the surgery performed on patients by the participating surgeons-in-training during the  
44  
45 follow-up period for the three sub-study procedures, as measured by the implant position on  
46  
47 the post-operative radiograph. The secondary outcome measures are procedure time, post-  
48  
49 operative complication rate and patient health state at 4 months post-operation (EQ-5D –  
50  
51 substudies 1 and 2 only).  
52  
53  
54  
55  
56  
57  
58  
59  
60

## Ethics, registration and dissemination

National research ethics approval was granted for this study by the NHS Research Authority South Birmingham Research Ethics Committee (15/WM/0464). Confidentiality Advisory Group approval was granted for accessing radiographic and outcome data without patient consent on 27 February 2017 (16/CAG/0125). The results of this trial will be submitted to a peer-reviewed journal and will inform educational and clinical practice.

## Trial registration number

ISRCTN20431944; Pre-results

Protocol version V\_P\_1.1

## Article Summary

Strengths and limitations of this study:

- This is the first randomised controlled trial assessing the impact of cadaveric simulation training on clinical outcomes
- Patient-centred outcome measures are used to measure an educational intervention for surgeons

- Multicentre study to maximize external validity of the results
- The training dose is small as cadaveric training is expensive to deliver
- Pragmatic approach to sample size which is limited by the capacity of the surgical training centre

## Introduction

It is imperative that surgeons are trained to a high standard, so they can perform safe and effective operations for patients. The quality and quantity of surgical training in the UK is currently under threat from a 'perfect storm' of factors(1). These include reduced working hours(2, 3), shift based working patterns(4) with the loss of the traditional surgical firm, and a move to expedite training and shorten specialist programmes(5, 6). This is set within a climate of unprecedented financial austerity in the NHS and ever increasing service pressures.

Simulation offers a solution to some of these challenges by moving the early part of the surgical learning curve away from patients into a controlled environment(7), where skills may be more rapidly acquired as compared to the clinical environment. Simulation is also



1  
2  
3 potentially a very efficient way of training, as large numbers of trainees can be trained  
4  
5 simultaneously, at an intensity not feasible in the clinical environment due to competing  
6  
7 service demands.  
8  
9

10  
11  
12  
13 Cadaveric simulation - training using deceased, preserved or fresh human bodies - is a  
14  
15 particularly promising modality for training. Fresh-frozen cadavers retain many of the soft  
16  
17 tissue handling characteristics seen in live patients, and in combination with presenting the  
18  
19 correct anatomy, particularly complex neurovascular relationships, may offer a more realistic  
20  
21 simulated operation than would be possible on a plastic model or virtual reality simulator(8,  
22  
23 9). Cadaveric material does not bleed(10) and hence may be less useful for simulating  
24  
25 procedures where haemorrhage control is an important feature.  
26  
27  
28  
29

30  
31  
32 The operating theatre environment can be simulated, including (but not limited to) surgical  
33  
34 dress, draping, instrumentation and multidisciplinary team. This 'whole dress rehearsal' for  
35  
36 surgery may enhance development of non-technical skills in addition to the technical  
37  
38 operative surgical skills(11).  
39  
40  
41  
42  
43

44  
45 There are several challenges in delivering cadaveric simulation training. It is expensive to  
46  
47 provide(9), particularly when cadaveric material has to be purchased under license where  
48  
49 there is not a local body donation programme. It requires considerable infrastructure to  
50  
51 deliver, including specialist wet laboratory facilities with the appropriately trained staff. These  
52  
53 challenges become particularly pressing when provision of cadaveric training on a large  
54  
55 scale is considered, and are an important driver in the development of high quality evidence  
56  
57  
58  
59  
60

1  
2  
3 of educational impact. This evidence is necessary before considerable financial investment  
4  
5  
6 can be recommended in providing cadaveric simulation training on a larger scale.  
7  
8  
9

10 There is abundant low quality evidence showing cadaveric simulation may induce short term  
11  
12 skill improvement as measured by subjective and behavioural metrics, but there is a lack of  
13  
14 high quality, quantitative evidence that skills learnt in cadaveric simulation can transfer to the  
15  
16 workplace, leading to improved outcomes for patients(8).  
17  
18  
19

20  
21  
22 Our trial attempts to address this evidence deficit, and is both topical and timely.  
23  
24  
25  
26  
27  
28  
29

### 30 Good Clinical Practice

31  
32  
33 This trial will be undertaken in compliance with Good Practice Guidelines, complying with the  
34  
35 Declaration of Helsinki and UK Legislation. Warwick standard operating procedures (SOPs)  
36  
37 will be followed.  
38  
39  
40  
41  
42  
43

### 44 Consolidated Standards of Reporting Trials

45  
46  
47 The results of the trial will be reported in line with the Consolidated Standard of Reporting  
48  
49 (CONSORT) statement(12). This protocol has been written according to the SPIRIT  
50  
51 reporting guidelines(13).  
52  
53  
54  
55  
56  
57

### 58 Aim

1  
2  
3  
4  
5  
6 The aim is to determine which of the two surgical training strategies for junior orthopaedic  
7  
8 surgeons-in-training leads to the best patient outcomes for three common procedures.  
9  
10  
11  
12  
13  
14  
15  
16  
17

### 18 Objectives

- 22 1. To assess the impact of a cadaveric simulation training intervention on the patient  
23  
24 outcome of operations performed by junior orthopaedic surgeons-in-training  
25  
26
- 27 2. To define the early learning curve of DHS, Hemiarthroplasty and ankle fracture  
28  
29 fixation  
30  
31
- 32 3. To explore the feasibility of using post-operative x-rays to assess technical skill  
33  
34  
35  
36  
37  
38  
39

### 40 Methods and Analysis

#### 41 42 43 44 Study design

45  
46  
47  
48 This is a UK multicentre, two-arm, group parallel randomised controlled educational trial  
49  
50  
51  
52

#### 53 54 Sample size

55  
56  
57  
58  
59  
60

1  
2  
3 This trial is the first attempt to objectively measure transfer of open operative skills from  
4  
5  
6 cadaveric simulation into the workplace using patient-based outcome measures. There is no  
7  
8  
9 available estimate of effect size to reference against a priori in determining sample size,  
10  
11 therefore a pragmatic approach to sample size will be taken in lieu of a formal power  
12  
13 calculation. The surgical training centre can accommodate 16 delegates at one time and  
14  
15 financial resources permitted one iteration of the cadaveric training course. Our maximum  
16  
17 sample size is therefore 16 participants in each arm of the study  
18  
19  
20  
21  
22  
23  
24

## 25 Outcome measures

### 26 27 28 29 A) Radiographic outcomes

30  
31  
32  
33  
34 The radiographs will be obtained electronically from hospital servers and the implant position  
35  
36 measured manually using computer software. The operations will be identified  
37  
38 retrospectively by access to the participating surgeons' electronic logbooks. The  
39  
40 measurements vary by operation type and are defined as follows.  
41  
42  
43  
44  
45  
46

### 47 **Sub-study 1: Dynamic Hip Screw**

#### 48 49 50 51 1. Primary Outcome

- 52  
53  
54     ▪ Tip-Apex distance (in mm)

#### 55 56 2. Secondary Outcomes (in order of importance)

- 57  
58  
59     ▪ Lag screw position in the femoral head (defined by Cleveland Zones)

- Plate flush to lateral femoral cortex (binary Y/N)
- 8 cortex hold for plate screws (binary Y/N)

### **Sub- study 2: Hemiarthroplasty**

#### 1. Primary Outcome

- Leg length discrepancy (mm)

#### 2. Secondary Outcomes (in order of importance)

- Femoral stem alignment (degrees off neutral)
- Cement mantle quality (Barrack grade score)
- Femoral offset change relative to native hip (mm)

### **Sub- study 3: Ankle fracture fixation**

#### 1. Primary Outcome

- Medial clear space (mm)

#### 2. Secondary Outcomes

- Lateral malleolar displacement (mm)
- Tibiofibular clear space (mm)
- Talocrural angle (degrees)
- Medial malleolar displacement (mm)

### **B) Clinical Outcomes**

1  
2  
3  
4  
5  
6 The clinical outcome measures for sub-studies 1-3 are;  
7  
8  
9

10 1) Procedure Time  
11  
12  
13  
14

15 Defined as knife-to-skin/surgical start time to wound closure/surgical stop time. These will be  
16 obtained from hospital theatre management systems. Procedure time has been chosen as  
17 an outcome measure as there is evidence in the literature that procedure time is inversely  
18 related to experience, and so can be used as a surrogate measure of technical  
19 proficiency(14)  
20  
21  
22  
23  
24  
25  
26  
27  
28  
29

30 2) Intra-operative radiation dose to patient  
31  
32  
33  
34

35 Defined as time under fluoroscopy (seconds) and radiation dose (mGym<sup>2</sup>). There is  
36 evidence that with increasing experience and skill, surgeons use less intra-operative x-rays  
37 to adjust the position of the fracture and implant(14). Hemiarthroplasty does not require  
38 fluoroscopy so this will not be used as an outcome measure for sub-study 2.  
39  
40  
41  
42  
43  
44  
45  
46

47 3) Post-operative complication rate  
48  
49  
50

51 The complications of interest are the acute post-operative complications during the inpatient  
52 admission. These will be sub-categorised as acute medical complications (hospital acquired  
53 pneumonia, renal complications, cardiac complications, DVT/PE) and surgical complications  
54 (wound infection, wound dehiscence, metalwork failure, deep infection).  
55  
56  
57  
58  
59  
60

1  
2  
3  
4  
5  
6 4) Health state at 4 months post-operation (EQ-5D)  
7  
8  
9

10 Health state at 4-months post-operation will be measured using EQ-5D, which is a  
11  
12 standardized instrument measuring generic health status, which has been widely validated  
13  
14 in clinical trials. This data is being collected separately as part of the WHiTE comprehensive  
15  
16 cohort study of hip fracture patients (ISRCTN63982700) and reported elsewhere(15). EQ-5D  
17  
18 will be used for sub-studies 1 and 2 only as these involve hip fractures.  
19  
20  
21  
22  
23  
24  
25  
26

27 Screening and eligibility  
28  
29  
30  
31

32 Orthopaedic surgeons-in-training in their first, second or third specialist training year in the  
33  
34 West Midlands Workforce Deanery will be eligible to participate in the trial. Eligible trainees  
35  
36 will be identified by liaison with the training programme directors for Trauma & Orthopaedic  
37  
38 surgery in the three West Midlands schools; Warwick, Birmingham and Oswestry. An  
39  
40 invitation email will be sent to all eligible trainees by programme administrators at the  
41  
42 deanery.  
43  
44  
45  
46  
47  
48  
49  
50

51 Inclusion criteria  
52  
53  
54  
55

- 56 1) Trauma & Orthopaedic surgeon-in-training in West Midlands school  
57  
58 (Warwick/Birmingham/Oswestry)  
59  
60

- 1
- 2
- 3
- 4 2) In specialty training year 1-3
- 5
- 6 3) Willing and able to attend a two-day cadaveric simulation training course at the West
- 7
- 8 Midlands Surgical Training Centre, Coventry
- 9
- 10
- 11
- 12

#### 13 Exclusion criteria

14

15

16

17

- 18 1) Unavailable on course dates
- 19
- 20
- 21
- 22
- 23
- 24

#### 25 Consent

26

27

28

29

#### 30 Surgeon participants:

31

32

33

34

35 Potential study participants will be provided with written and verbal information about the  
36 study. Consent will be obtained by the trial team. The right to refuse participation without  
37 giving reasons will be fully respected, and enrolled participants will be free to withdraw from  
38 the study at any time without reason, and without prejudice to their training. All participants  
39 will be provided with the contact information of a team member who can provide further  
40 information about the study. All participants who are allocated to the control group will have  
41 the opportunity to undertake the cadaveric simulation training intervention at the end of the  
42 study follow-up. This provision is being offered so that the control group are not  
43 disadvantaged in their access to educational opportunity by virtue of being randomised to  
44 the control group.  
45  
46  
47  
48  
49  
50  
51  
52  
53  
54  
55  
56  
57  
58  
59  
60



1  
2  
3 Patients whose operations are assessed:  
4  
5  
6  
7

8 Patients who undergo an operation by a surgeon who is participating in the study will not be  
9  
10 separately consented to allow access to radiographs to assess their implant position or  
11  
12 clinical outcome data. Permission to access this information for the purposes of this study  
13  
14 without patient consent has been granted from the confidentiality advisory group  
15  
16 (16/CAG/0125). It is recognised that seeking consent from a group of primarily elderly, frail  
17  
18 patients to assess low risk, routine clinical data in a secure manner for a trial they are not  
19  
20 directly participating in would be unduly burdensome for the patients. All patient data will be  
21  
22 fully anonymised and handled securely in line with university data regulations.  
23  
24  
25  
26  
27  
28  
29

### 30 Randomisation

31  
32  
33

34 Participants will be randomised at the point of recruitment using block randomisation (block  
35  
36 size 4) to generate a random sequence list, to which participants will be assigned in the  
37  
38 order that they enter the study. The allocation sequence will be generated by a senior  
39  
40 medical statistician, participants will be enrolled by the trial team.  
41  
42  
43  
44  
45  
46  
47  
48

### 49 Postrandomisation withdrawals

50  
51  
52

53 Withdrawn participants will not be replaced.  
54  
55  
56  
57

### 58 Study setting

59  
60

1  
2  
3  
4  
5  
6 The study participants will be on training rotations within the regional hospitals of the West  
7  
8 Midlands during the study follow-up. The hospitals where trainees have been working, and  
9  
10 performing operations, during the study follow up will be identified from the participants  
11  
12 electronic surgical logbook records.  
13  
14  
15  
16  
17  
18  
19

## 20 Interventions

### 21 22 23 24 25 Control group

26  
27  
28  
29 The control group will undertake standard residency training according to the master-  
30  
31 apprentice model, which is the current standard practice in UK. No additional training or  
32  
33 access to learning materials will be provided beyond the fortnightly didactic teaching  
34  
35 sessions which are delivered as a part of routine training.  
36  
37  
38  
39

### 40 41 42 Intervention group (cadaveric simulation trained)

43  
44  
45  
46 Participants allocated to the intervention group will receive an intensive, 2-day cadaveric  
47  
48 simulation training course at the start of the training year, where 4 common orthopaedic  
49  
50 surgical procedures will be taught (DHS, hemiarthroplasty, ankle fracture fixation and lower  
51  
52 limb fasciotomy). All intervention participants will receive training on all 4 procedures, which  
53  
54 will be considered separately in the analysis as individual sub-studies (as they have different  
55  
56 radiographic outcome measures). The fasciotomy procedure is included as a 'filler' to make  
57  
58  
59  
60

1  
2  
3 the course structure work, and chosen because it is an important high-stakes, anatomically  
4  
5 critical operation that is rarely performed by trainees. Outcomes related to the fasciotomy  
6  
7 procedure will not be collected or included in the analysis.  
8  
9

#### 10 11 12 13 14 15 The cadaveric simulation training course 16

17  
18  
19  
20 The course will be delivered in September at the start of the surgical training year (which  
21  
22 runs August to August). The course will take place at the West Midlands Surgical Training  
23  
24 Centre (WMSTC) at the University Hospital Coventry & Warwickshire (UHCW). The WMSTC  
25  
26 is a specialized wet-laboratory facility for delivering cadaveric training, and has an  
27  
28 experienced dedicated faculty to facilitate training delivery.  
29  
30  
31

32  
33  
34 The course will consist of two full days of teaching, with expert consultant faculty teaching on  
35  
36 fresh-frozen hemi-cadavers (waist-to-toe-tip). The participant:faculty ratio will be 2:1, and  
37  
38 participant:cadaver ratio will be 2:1. Each participant will undertake each of the four  
39  
40 procedures in their entirety as primary surgeon('skin-to-skin'), and will act as assistant when  
41  
42 their partner is the primary surgeon four times. Hence each participant is exposed to eight  
43  
44 procedures during the course:  
45  
46  
47  
48  
49  
50  
51

52  
53 The environment and psychological fidelity of the simulation will be maximised by providing;  
54  
55

- 56  
57  
58 • Full surgical dress including masks, gloves, gowns and lead x-ray aprons  
59  
60

- The usual disposable surgical drapes
- Skin preparation (iodine solution) to prepare the surgical site, and participants and faculty will be asked to observe the usual sterile field precautions as in real theatre
- Full surgical instrument trays, surgical implants and cement (for hemiarthroplasty) of the same type as in real theatre will be used
- Image intensifier (mobile x-ray) will be available for intra-operative use
- Background noise levels and room temperature were maintained at what would usually be expected in the operating theatre

The simulated operating theatres will be set up within the WMSTC as two parallel round-robin circuits. The two stations requiring x-ray use (DHS and ankle ORIF) will be set up at the far end of the room to create a radiation zone and where appropriate, standard precautions will be used. Careful consideration will be given to the optimum sequential use of the cadaveric specimens in planning the course structure. For example, it is necessary that the DHS station precedes the hemiarthroplasty station as it would obviously not be possible to perform a DHS operation when the femoral head had been removed. Similarly, the fasciotomy incisions would compromise the soft tissue envelope of the lower limb to a sufficient degree that the fidelity of the ankle ORIF station would be compromised. It is important to make the best and most efficient use of the cadaveric material, for both ethical and financial reasons.

Blinding

1  
2  
3 The participants cannot be blinded to the type of training they receive, neither can the trial  
4  
5 team in organising the cadaveric simulation training. The trial team will take no part in the  
6  
7 training of participants. The assessment of radiographic images will be made blinded to  
8  
9 group allocation.  
10  
11  
12  
13  
14

#### 15 Adverse event management

16  
17  
18  
19

20 In the unlikely event of a serious adverse event (SAE), the chief investigator will report to the  
21  
22 sponsor (University of Warwick), ethics committee and project supervisors.  
23  
24  
25  
26

#### 27 Patient and public involvement

28  
29  
30  
31

32 There was no direct patient or public involvement in the design of the study, although clearly  
33  
34 training competent surgeons is in the public interest. There is qualitative work to be done  
35  
36 around this trial to better understand patient expectations of surgical training.  
37  
38  
39  
40

#### 41 End of trial

42  
43  
44  
45

46 The trial will end when all the radiographic and clinical outcome data has been collected  
47  
48 from the participating sites. The trial will be stopped prematurely if required by the ethics  
49  
50 committee, following recommendations from the sponsor, or if funding for the study is  
51  
52 withdrawn. The research ethics committee and confidentiality advisory group will be notified  
53  
54 in writing once the trial is complete.  
55  
56  
57  
58  
59  
60

## Trial Oversight

This trial is being undertaken as part of a doctoral research project (HKJ), and supervised by three senior supervisors (DG, JF, GTRP). The supervisors will act as the trial management group and steering committee. The trial is being conducted within a registered Clinical Trials Unit, and will follow the CTU standard operating procedures.

## Data Collection Plan

Data on the numbers of procedures performed by the participating surgeons at baseline will be collected. The operations performed by the participants during study follow-up will be identified by the surgeons' electronic logbook. Only procedures coded as 'S-TS: supervised-trainer scrubbed' or 'STU: supervised trainer unscrubbed' will be included in the analysis.

This is to ensure that only procedures where the trainee has performed the key parts (S-TS) or the entire procedure (STU) are included. If further information on supervisor input/takeover is required this can be obtained by accessing the corresponding procedure based assessment (PBA) record for the operation. PBAs are routinely collected as part of training.

Procedure data will be extracted and anonymised to study identifier by the electronic logbook data team, before being sent to the trial team. The data will include operation type, date, hospital, hospital ID, patient age, American Society of Anaesthesiologists Grade and supervision code. The radiographs and clinical outcome data relating to these procedures will then be obtained from the study sites via liaison with the respective Research &

1  
2  
3  
4 Development Departments. Data will be entered into a secure trial database on a  
5  
6 professionally encrypted trial-specific computer, fully anonymised with only study identifiers.  
7

8  
9 Once data collection is complete, and prior to analysis, range checks for data values will be  
10  
11 undertaken, and data will be double checked on entry to the statistical software package.  
12

13  
14 The project supervisors will act as the data monitoring committee. No interim analysis will be  
15  
16 undertaken. The trial team and statistician will have access to the final trial dataset.  
17

### 18 19 20 Statistical Analysis Plan 21

22  
23  
24  
25 Baseline data including completed months of training and number of prior procedures  
26  
27 performed will be summarised and compared between the two arms of the study. A  
28

29  
30 CONSORT chart showing the flow of participants through the study will be produced.  
31

32  
33 The three taught procedures (substudies 1-3) will be analysed and reported individually.  
34  
35

36  
37 The main analysis will investigate and report differences between the two groups with  
38  
39 respect to the implant positions (as measured from radiographs), the procedure times, the  
40  
41 intra-operative radiation dose to the patient, and patient outcomes, as measured by post-  
42  
43 operative complications and health state at 4 months post-operation (hip fractures only).  
44  
45

46  
47  
48  
49 Statistical tests will be two-sided and considered to demonstrate a significant difference  
50  
51 when  $p < 0.05$ . Temporal trends by group for implant position, procedure time and radiation  
52  
53 dose will be presented. Linear mixed effects models will be fitted to allow for within-surgeon  
54  
55 correlation between repeated observations (surgeon clustering as a random effect), and to  
56  
57 adjust for important co-variables such as patient condition, age and surgeon experience.  
58  
59  
60

1  
2  
3 These will be summarised by plotting individual learning curves, and then modelled to  
4  
5  
6 estimate the overall learning curves for the two arms of the study.  
7  
8  
9

10 Descriptive statistical analyses of between-group comparisons will be presented for  
11  
12 complication rate and health state, with temporal analysis of the latter being reported if  
13  
14 appropriate and feasible. The statistical analysis will be supervised and checked by a senior  
15  
16 medical statistician at Warwick University.  
17  
18  
19

20  
21  
22 In the event of missing data, statistician advice will be sought on multiple imputation.  
23  
24  
25

## 26 27 Ethics and dissemination 28 29 30

31  
32 Master-apprentice 'on-the-job' training for surgeons is the current training standard in the  
33  
34 UK(10, 16), and therefore the control arm of the study reflects usual practice. The cadaveric  
35  
36 simulation training intervention is an experimental educational intervention and does not  
37  
38 expose trial participants to any substantial risks of harm. The trial results will be reported in  
39  
40 accordance with the CONSORT statement, and disseminated through publication in peer  
41  
42 reviewed journals and conferences. The results of the trial will be presented to Health  
43  
44 Education England and the Royal Surgical College. The dataset, statistical code and  
45  
46 technical appendices will be made available on request to the corresponding author.  
47  
48  
49  
50  
51

## 52 53 Funding 54 55 56

57  
58 This work was supported by Versus Arthritis grant number 20845  
59  
60



1  
2  
3  
4  
5  
6 Sponsor Contact Information  
7  
8  
9

10 Mrs Jane Prewitt, University of Warwick, Research & Impact Services, University House,  
11  
12 Kirby Corner Road, Coventry, CV4 8UW  
13  
14  
15

16  
17  
18 wmsponsorship@warwick.ac.uk  
19  
20  
21  
22

23  
24 Declaration/Conflict of Interests  
25  
26

27 None to declare  
28  
29  
30  
31  
32  
33  
34  
35  
36  
37  
38  
39  
40  
41  
42  
43  
44  
45  
46  
47  
48  
49  
50  
51  
52  
53

54 References:  
55  
56

- 57 1. Temple J. Time for Training. A Review of the impact of the European Working Time  
58 Directive on the quality of training. London: Medical Education England; 2010.  
59  
60

2. Maxwell AJ, Crocker M, Jones TL, Bhagawati D, Papadopoulos MC, Bell BA. Implementation of the European Working Time Directive in neurosurgery reduces continuity of care and training opportunities. *Acta Neurochirurgica*. 2010;152(7):1207-10.
3. Pickersgill T. The European working time directive for doctors in training. *BMJ*. 2001;323(7324):1266.
4. Marron C, Byrnes C, Kirk S. An EWTD-compliant shift rota decreases training opportunities. *Bulletin of the Royal College of Surgeons of England*. 2005;87(7):246-8.
5. Training So. Report from the UK Shape of Training Steering Group (UKSTSG). General Medical Council; 2017.
6. England RCoSo. Improving Surgical Training - Trainee Prospectus. London: The Royal College of Surgeons; 2018.
7. Curran I. A Framework for Technology Enhanced Learning. London: Department of Health; 2011.
8. James H, Chapman A, Pattison G, Griffin DR, Fisher J. Current status of Cadaveric Simulation for surgical training: a Systematic Review. *British Journal of Surgery*. 2019.
9. Gilbody J, Prasthofer A, Ho K, Costa M. The use and effectiveness of cadaveric workshops in higher surgical training: a systematic review. *Annals of the Royal College of Surgeons of England*. 2011;93(5):347-56.
10. Reznick RK, MacRae H. Teaching surgical skills--changes in the wind. *N Engl J Med*. 2006;355(25):2664-9.
11. James H, Pattison G, Griffin D, Fisher J. How does cadaveric simulation influence learning in Orthopedic residents? *Journal of Surgical Education*. 2020;In Press.
12. Schulz KF, Altman DG, Moher D. CONSORT 2010 Statement: updated guidelines for reporting parallel group randomised trials. *BMJ*. 2010;340.
13. Chan A-W, Tetzlaff JM, Altman DG, Laupacis A, Gøtzsche PC, Krleža-Jerić K, et al. SPIRIT 2013 Statement: Defining Standard Protocol Items for Clinical Trials. *Annals of Internal Medicine*. 2013;158(3):200-7.
14. James H, Chapman A, Pattison G, Fisher JG, Griffin DR. Assessment of technical skill acquisition and operative competence in Trauma and Orthopaedic surgical training: A systematic review. *JBJS(Am) Reviews*. 2019.
15. Costa ML, Griffin XL, Achten J, Metcalfe D, Judge A, Pinedo-Villanueva R, et al. World Hip Trauma Evaluation (WHiTE): framework for embedded comprehensive cohort studies. *BMJ Open*. 2016;6(10):e011679.
16. Hargreaves DH, Bowditch MG, Griffin DR. *On-the-job training for surgeons*. 1 ed. London: The Royal Society of Medicine Press; 1997.

#### Author Statement/Contributions

HKJ designed the study and wrote the manuscript

GTRP co-designed the study and the intervention and edited the manuscript

JDF edited the manuscript, made a substantial contribution to the design and is lead supervisor for the qualitative part of the project

1  
2  
3  
4  
5  
6  
7  
8  
9  
10  
11  
12  
13  
14  
15  
16  
17  
18  
19  
20  
21  
22  
23  
24  
25  
26  
27  
28  
29  
30  
31  
32  
33  
34  
35  
36  
37  
38  
39  
40  
41  
42  
43  
44  
45  
46  
47  
48  
49  
50  
51  
52  
53  
54  
55  
56  
57  
58  
59  
60

DG co-designed the study, edited draft protocols and is lead supervisor for the quantitative part of the project

**Acknowledgements**

None

For peer review only

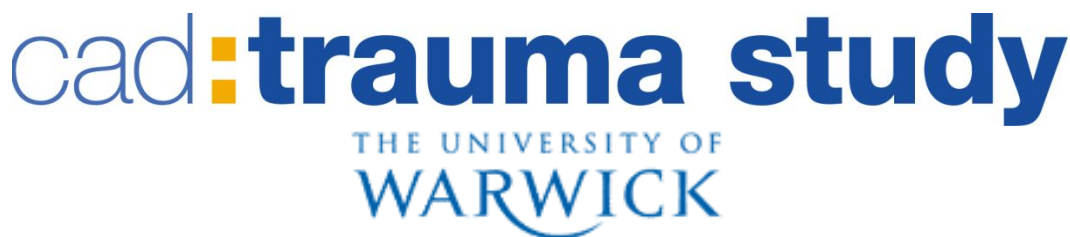

**CONSENT FORM**

**(Biomedical and Scientific Research Ethics Committee) Study Number:** REGO-2014-718

**Title of Project:** cad:trauma study

**Name of Researcher(s):** Mrs Hannah James, Professor Damian Griffin, Mr Giles Pattison, Dr Jane Kidd

Please initial all boxes

1. I confirm that I have read and understand the information sheet dated **April 2014 (version 1)** for the above study. I have had the opportunity to consider the information, ask questions and have had these answered satisfactorily.
2. I understand that my participation is voluntary and that I am free to withdraw at any time without giving any reason, without my education or legal rights being affected.
3. I understand that relevant sections of data collected during the study, may be looked at by individuals from The University of Warwick or from regulatory authorities where it is relevant. I give permission for these individuals to have access to this data.
4. I agree to take part in the above study.

|                     |      |           |
|---------------------|------|-----------|
|                     |      |           |
| Name of Participant | Date | Signature |

|                               |      |           |
|-------------------------------|------|-----------|
|                               |      |           |
| Name of Person taking consent | Date | Signature |

# Reporting checklist for protocol of a clinical trial.

Based on the SPIRIT guidelines.

## Instructions to authors

Complete this checklist by entering the page numbers from your manuscript where readers will find each of the items listed below.

Your article may not currently address all the items on the checklist. Please modify your text to include the missing information. If you are certain that an item does not apply, please write "n/a" and provide a short explanation.

Upload your completed checklist as an extra file when you submit to a journal.

In your methods section, say that you used the SPIRIT reporting guidelines, and cite them as:

Chan A-W, Tetzlaff JM, Altman DG, Laupacis A, Gøtzsche PC, Krleža-Jerić K, Hróbjartsson A, Mann H, Dickersin K, Berlin J, Doré C, Parulekar W, Summerskill W, Groves T, Schulz K, Sox H, Rockhold FW, Rennie D, Moher D. SPIRIT 2013 Statement: Defining standard protocol items for clinical trials. *Ann Intern Med.* 2013;158(3):200-207

|                                             |                     | Reporting Item                                                                                               | Page Number |
|---------------------------------------------|---------------------|--------------------------------------------------------------------------------------------------------------|-------------|
| <b>Administrative information</b>           |                     |                                                                                                              |             |
| Title                                       | <a href="#">#1</a>  | Descriptive title identifying the study design, population, interventions, and, if applicable, trial acronym | 1           |
| Trial registration                          | <a href="#">#2a</a> | Trial identifier and registry name. If not yet registered, name of intended registry                         | 3           |
| Trial registration: data set                | <a href="#">#2b</a> | All items from the World Health Organization Trial Registration Data Set                                     | 3           |
| Protocol version                            | <a href="#">#3</a>  | Date and version identifier                                                                                  | 3           |
| Funding                                     | <a href="#">#4</a>  | Sources and types of financial, material, and other support                                                  | 15          |
| Roles and responsibilities: contributorship | <a href="#">#5a</a> | Names, affiliations, and roles of protocol contributors                                                      | 1           |

|    |                           |                     |                                                                   |     |
|----|---------------------------|---------------------|-------------------------------------------------------------------|-----|
| 1  | Roles and                 | <a href="#">#5b</a> | Name and contact information for the trial sponsor                | 15  |
| 2  | responsibilities:         |                     |                                                                   |     |
| 3  | sponsor contact           |                     |                                                                   |     |
| 4  | information               |                     |                                                                   |     |
| 5  |                           |                     |                                                                   |     |
| 6  |                           |                     |                                                                   |     |
| 7  |                           |                     |                                                                   |     |
| 8  | Roles and                 | <a href="#">#5c</a> | Role of study sponsor and funders, if any, in study design;       | 14  |
| 9  | responsibilities:         |                     | collection, management, analysis, and interpretation of data;     |     |
| 10 | sponsor and funder        |                     | writing of the report; and the decision to submit the report for  |     |
| 11 |                           |                     | publication, including whether they will have ultimate            |     |
| 12 |                           |                     | authority over any of these activities                            |     |
| 13 |                           |                     |                                                                   |     |
| 14 |                           |                     |                                                                   |     |
| 15 |                           |                     |                                                                   |     |
| 16 | Roles and                 | <a href="#">#5d</a> | Composition, roles, and responsibilities of the coordinating      | 14  |
| 17 | responsibilities:         |                     | centre, steering committee, endpoint adjudication committee,      |     |
| 18 | committees                |                     | data management team, and other individuals or groups             |     |
| 19 |                           |                     | overseeing the trial, if applicable (see Item 21a for data        |     |
| 20 |                           |                     | monitoring committee)                                             |     |
| 21 |                           |                     |                                                                   |     |
| 22 |                           |                     |                                                                   |     |
| 23 |                           |                     |                                                                   |     |
| 24 | <b>Introduction</b>       |                     |                                                                   |     |
| 25 |                           |                     |                                                                   |     |
| 26 |                           |                     |                                                                   |     |
| 27 | Background and            | <a href="#">#6a</a> | Description of research question and justification for            | 1   |
| 28 | rationale                 |                     | undertaking the trial, including summary of relevant studies      |     |
| 29 |                           |                     | (published and unpublished) examining benefits and harms          |     |
| 30 |                           |                     | for each intervention                                             |     |
| 31 |                           |                     |                                                                   |     |
| 32 |                           |                     |                                                                   |     |
| 33 |                           |                     |                                                                   |     |
| 34 | Background and            | <a href="#">#6b</a> | Explanation for choice of comparators                             | 11  |
| 35 | rationale: choice of      |                     |                                                                   |     |
| 36 | comparators               |                     |                                                                   |     |
| 37 |                           |                     |                                                                   |     |
| 38 |                           |                     |                                                                   |     |
| 39 | Objectives                | <a href="#">#7</a>  | Specific objectives or hypotheses                                 | 5-6 |
| 40 |                           |                     |                                                                   |     |
| 41 | Trial design              | <a href="#">#8</a>  | Description of trial design including type of trial (eg, parallel | 5   |
| 42 |                           |                     | group, crossover, factorial, single group), allocation ratio, and |     |
| 43 |                           |                     | framework (eg, superiority, equivalence, non-inferiority,         |     |
| 44 |                           |                     | exploratory)                                                      |     |
| 45 |                           |                     |                                                                   |     |
| 46 |                           |                     |                                                                   |     |
| 47 |                           |                     |                                                                   |     |
| 48 | <b>Methods:</b>           |                     |                                                                   |     |
| 49 | <b>Participants,</b>      |                     |                                                                   |     |
| 50 | <b>interventions, and</b> |                     |                                                                   |     |
| 51 | <b>outcomes</b>           |                     |                                                                   |     |
| 52 |                           |                     |                                                                   |     |
| 53 |                           |                     |                                                                   |     |
| 54 |                           |                     |                                                                   |     |
| 55 | Study setting             | <a href="#">#9</a>  | Description of study settings (eg, community clinic, academic     | 10  |
| 56 |                           |                     | hospital) and list of countries where data will be collected.     |     |
| 57 |                           |                     | Reference to where list of study sites can be obtained            |     |
| 58 |                           |                     |                                                                   |     |
| 59 |                           |                     |                                                                   |     |
| 60 |                           |                     |                                                                   |     |

|    |                      |                      |                                                                                                                                                                                                                                                                                                                                                                                |                         |
|----|----------------------|----------------------|--------------------------------------------------------------------------------------------------------------------------------------------------------------------------------------------------------------------------------------------------------------------------------------------------------------------------------------------------------------------------------|-------------------------|
| 1  | Eligibility criteria | <a href="#">#10</a>  | Inclusion and exclusion criteria for participants. If applicable, eligibility criteria for study centres and individuals who will perform the interventions (eg, surgeons, psychotherapists)                                                                                                                                                                                   | 9                       |
| 2  |                      |                      |                                                                                                                                                                                                                                                                                                                                                                                |                         |
| 3  |                      |                      |                                                                                                                                                                                                                                                                                                                                                                                |                         |
| 4  |                      |                      |                                                                                                                                                                                                                                                                                                                                                                                |                         |
| 5  |                      |                      |                                                                                                                                                                                                                                                                                                                                                                                |                         |
| 6  | Interventions:       | <a href="#">#11a</a> | Interventions for each group with sufficient detail to allow replication, including how and when they will be administered                                                                                                                                                                                                                                                     | 11-13                   |
| 7  | description          |                      |                                                                                                                                                                                                                                                                                                                                                                                |                         |
| 8  |                      |                      |                                                                                                                                                                                                                                                                                                                                                                                |                         |
| 9  |                      |                      |                                                                                                                                                                                                                                                                                                                                                                                |                         |
| 10 |                      |                      |                                                                                                                                                                                                                                                                                                                                                                                |                         |
| 11 | Interventions:       | <a href="#">#11b</a> | Criteria for discontinuing or modifying allocated interventions for a given trial participant (eg, drug dose change in response to harms, participant request, or improving / worsening disease)                                                                                                                                                                               | N/A – educational trial |
| 12 | modifications        |                      |                                                                                                                                                                                                                                                                                                                                                                                |                         |
| 13 |                      |                      |                                                                                                                                                                                                                                                                                                                                                                                |                         |
| 14 |                      |                      |                                                                                                                                                                                                                                                                                                                                                                                |                         |
| 15 |                      |                      |                                                                                                                                                                                                                                                                                                                                                                                |                         |
| 16 |                      |                      |                                                                                                                                                                                                                                                                                                                                                                                |                         |
| 17 |                      |                      |                                                                                                                                                                                                                                                                                                                                                                                |                         |
| 18 | Interventions:       | <a href="#">#11c</a> | Strategies to improve adherence to intervention protocols, and any procedures for monitoring adherence (eg, drug tablet return; laboratory tests)                                                                                                                                                                                                                              | N/A – educational trial |
| 19 | adherence            |                      |                                                                                                                                                                                                                                                                                                                                                                                |                         |
| 20 |                      |                      |                                                                                                                                                                                                                                                                                                                                                                                |                         |
| 21 |                      |                      |                                                                                                                                                                                                                                                                                                                                                                                |                         |
| 22 |                      |                      |                                                                                                                                                                                                                                                                                                                                                                                |                         |
| 23 |                      |                      |                                                                                                                                                                                                                                                                                                                                                                                |                         |
| 24 | Interventions:       | <a href="#">#11d</a> | Relevant concomitant care and interventions that are permitted or prohibited during the trial                                                                                                                                                                                                                                                                                  | N/A – educational trial |
| 25 | concomitant care     |                      |                                                                                                                                                                                                                                                                                                                                                                                |                         |
| 26 |                      |                      |                                                                                                                                                                                                                                                                                                                                                                                |                         |
| 27 |                      |                      |                                                                                                                                                                                                                                                                                                                                                                                |                         |
| 28 |                      |                      |                                                                                                                                                                                                                                                                                                                                                                                |                         |
| 29 | Outcomes             | <a href="#">#12</a>  | Primary, secondary, and other outcomes, including the specific measurement variable (eg, systolic blood pressure), analysis metric (eg, change from baseline, final value, time to event), method of aggregation (eg, median, proportion), and time point for each outcome. Explanation of the clinical relevance of chosen efficacy and harm outcomes is strongly recommended | 6-7                     |
| 30 |                      |                      |                                                                                                                                                                                                                                                                                                                                                                                |                         |
| 31 |                      |                      |                                                                                                                                                                                                                                                                                                                                                                                |                         |
| 32 |                      |                      |                                                                                                                                                                                                                                                                                                                                                                                |                         |
| 33 |                      |                      |                                                                                                                                                                                                                                                                                                                                                                                |                         |
| 34 |                      |                      |                                                                                                                                                                                                                                                                                                                                                                                |                         |
| 35 |                      |                      |                                                                                                                                                                                                                                                                                                                                                                                |                         |
| 36 |                      |                      |                                                                                                                                                                                                                                                                                                                                                                                |                         |
| 37 |                      |                      |                                                                                                                                                                                                                                                                                                                                                                                |                         |
| 38 |                      |                      |                                                                                                                                                                                                                                                                                                                                                                                |                         |
| 39 |                      |                      |                                                                                                                                                                                                                                                                                                                                                                                |                         |
| 40 | Participant timeline | <a href="#">#13</a>  | Time schedule of enrolment, interventions (including any run-ins and washouts), assessments, and visits for participants. A schematic diagram is highly recommended (see Figure)                                                                                                                                                                                               | 11                      |
| 41 |                      |                      |                                                                                                                                                                                                                                                                                                                                                                                |                         |
| 42 |                      |                      |                                                                                                                                                                                                                                                                                                                                                                                |                         |
| 43 |                      |                      |                                                                                                                                                                                                                                                                                                                                                                                |                         |
| 44 |                      |                      |                                                                                                                                                                                                                                                                                                                                                                                |                         |
| 45 |                      |                      |                                                                                                                                                                                                                                                                                                                                                                                |                         |
| 46 |                      |                      |                                                                                                                                                                                                                                                                                                                                                                                |                         |
| 47 | Sample size          | <a href="#">#14</a>  | Estimated number of participants needed to achieve study objectives and how it was determined, including clinical and statistical assumptions supporting any sample size calculations                                                                                                                                                                                          | 6                       |
| 48 |                      |                      |                                                                                                                                                                                                                                                                                                                                                                                |                         |
| 49 |                      |                      |                                                                                                                                                                                                                                                                                                                                                                                |                         |
| 50 |                      |                      |                                                                                                                                                                                                                                                                                                                                                                                |                         |
| 51 |                      |                      |                                                                                                                                                                                                                                                                                                                                                                                |                         |
| 52 |                      |                      |                                                                                                                                                                                                                                                                                                                                                                                |                         |
| 53 |                      |                      |                                                                                                                                                                                                                                                                                                                                                                                |                         |
| 54 | Recruitment          | <a href="#">#15</a>  | Strategies for achieving adequate participant enrolment to reach target sample size                                                                                                                                                                                                                                                                                            | 8                       |
| 55 |                      |                      |                                                                                                                                                                                                                                                                                                                                                                                |                         |
| 56 |                      |                      |                                                                                                                                                                                                                                                                                                                                                                                |                         |
| 57 |                      |                      |                                                                                                                                                                                                                                                                                                                                                                                |                         |
| 58 |                      |                      |                                                                                                                                                                                                                                                                                                                                                                                |                         |
| 59 |                      |                      |                                                                                                                                                                                                                                                                                                                                                                                |                         |
| 60 |                      |                      |                                                                                                                                                                                                                                                                                                                                                                                |                         |

1 **Methods:**

2 **Assignment of**  
3 **interventions (for**  
4 **controlled trials)**  
5  
6

|    |                                          |                      |                                                                                                                                                                                                                                                                                                                                                          |                         |
|----|------------------------------------------|----------------------|----------------------------------------------------------------------------------------------------------------------------------------------------------------------------------------------------------------------------------------------------------------------------------------------------------------------------------------------------------|-------------------------|
| 7  | Allocation: sequence generation          | <a href="#">#16a</a> | Method of generating the allocation sequence (eg, computer-generated random numbers), and list of any factors for stratification. To reduce predictability of a random sequence, details of any planned restriction (eg, blocking) should be provided in a separate document that is unavailable to those who enrol participants or assign interventions | 10                      |
| 17 | Allocation concealment mechanism         | <a href="#">#16b</a> | Mechanism of implementing the allocation sequence (eg, central telephone; sequentially numbered, opaque, sealed envelopes), describing any steps to conceal the sequence until interventions are assigned                                                                                                                                                | 10                      |
| 24 | Allocation: implementation               | <a href="#">#16c</a> | Who will generate the allocation sequence, who will enrol participants, and who will assign participants to interventions                                                                                                                                                                                                                                | 10                      |
| 28 | Blinding (masking)                       | <a href="#">#17a</a> | Who will be blinded after assignment to interventions (eg, trial participants, care providers, outcome assessors, data analysts), and how                                                                                                                                                                                                                | 13                      |
| 34 | Blinding (masking): emergency unblinding | <a href="#">#17b</a> | If blinded, circumstances under which unblinding is permissible, and procedure for revealing a participant's allocated intervention during the trial                                                                                                                                                                                                     | N/A - educational trial |

39 **Methods: Data**  
40 **collection,**  
41 **management, and**  
42 **analysis**  
43  
44

|    |                                 |                      |                                                                                                                                                                                                                                                                                                                                                                                                              |    |
|----|---------------------------------|----------------------|--------------------------------------------------------------------------------------------------------------------------------------------------------------------------------------------------------------------------------------------------------------------------------------------------------------------------------------------------------------------------------------------------------------|----|
| 46 | Data collection plan            | <a href="#">#18a</a> | Plans for assessment and collection of outcome, baseline, and other trial data, including any related processes to promote data quality (eg, duplicate measurements, training of assessors) and a description of study instruments (eg, questionnaires, laboratory tests) along with their reliability and validity, if known. Reference to where data collection forms can be found, if not in the protocol | 14 |
| 57 | Data collection plan: retention | <a href="#">#18b</a> | Plans to promote participant retention and complete follow-up, including list of any outcome data to be collected for                                                                                                                                                                                                                                                                                        | 14 |



participants who discontinue or deviate from intervention protocols

|    |                            |                      |                                                                           |
|----|----------------------------|----------------------|---------------------------------------------------------------------------|
| 1  |                            |                      |                                                                           |
| 2  |                            |                      |                                                                           |
| 3  |                            |                      |                                                                           |
| 4  | Data management            | <a href="#">#19</a>  | Plans for data entry, coding, security, and storage, including 14         |
| 5  |                            |                      | any related processes to promote data quality (eg, double data            |
| 6  |                            |                      | entry; range checks for data values). Reference to where                  |
| 7  |                            |                      | details of data management procedures can be found, if not in             |
| 8  |                            |                      | the protocol                                                              |
| 9  |                            |                      |                                                                           |
| 10 |                            |                      |                                                                           |
| 11 |                            |                      |                                                                           |
| 12 | Statistics: outcomes       | <a href="#">#20a</a> | Statistical methods for analysing primary and secondary 14-15             |
| 13 |                            |                      | outcomes. Reference to where other details of the statistical             |
| 14 |                            |                      | analysis plan can be found, if not in the protocol                        |
| 15 |                            |                      |                                                                           |
| 16 |                            |                      |                                                                           |
| 17 | Statistics: additional     | <a href="#">#20b</a> | Methods for any additional analyses (eg, subgroup and 14-15               |
| 18 | analyses                   |                      | adjusted analyses)                                                        |
| 19 |                            |                      |                                                                           |
| 20 |                            |                      |                                                                           |
| 21 | Statistics: analysis       | <a href="#">#20c</a> | Definition of analysis population relating to protocol non- 15            |
| 22 | population and             |                      | adherence (eg, as randomised analysis), and any statistical               |
| 23 | missing data               |                      | methods to handle missing data (eg, multiple imputation)                  |
| 24 |                            |                      |                                                                           |
| 25 |                            |                      |                                                                           |
| 26 |                            |                      |                                                                           |
| 27 | <b>Methods: Monitoring</b> |                      |                                                                           |
| 28 |                            |                      |                                                                           |
| 29 | Data monitoring:           | <a href="#">#21a</a> | Composition of data monitoring committee (DMC); summary 14                |
| 30 | formal committee           |                      | of its role and reporting structure; statement of whether it is           |
| 31 |                            |                      | independent from the sponsor and competing interests; and                 |
| 32 |                            |                      | reference to where further details about its charter can be               |
| 33 |                            |                      | found, if not in the protocol. Alternatively, an explanation of           |
| 34 |                            |                      | why a DMC is not needed                                                   |
| 35 |                            |                      |                                                                           |
| 36 |                            |                      |                                                                           |
| 37 |                            |                      |                                                                           |
| 38 |                            |                      |                                                                           |
| 39 | Data monitoring:           | <a href="#">#21b</a> | Description of any interim analyses and stopping guidelines, 14           |
| 40 | interim analysis           |                      | including who will have access to these interim results and               |
| 41 |                            |                      | make the final decision to terminate the trial                            |
| 42 |                            |                      |                                                                           |
| 43 |                            |                      |                                                                           |
| 44 | Harms                      | <a href="#">#22</a>  | Plans for collecting, assessing, reporting, and managing N/A –            |
| 45 |                            |                      | solicited and spontaneously reported adverse events and other educational |
| 46 |                            |                      | unintended effects of trial interventions or trial conduct trial          |
| 47 |                            |                      |                                                                           |
| 48 |                            |                      |                                                                           |
| 49 | Auditing                   | <a href="#">#23</a>  | Frequency and procedures for auditing trial conduct, if any, N/A –        |
| 50 |                            |                      | and whether the process will be independent from educational              |
| 51 |                            |                      | investigators and the sponsor trial                                       |
| 52 |                            |                      |                                                                           |
| 53 |                            |                      |                                                                           |
| 54 |                            |                      |                                                                           |
| 55 | <b>Ethics and</b>          |                      |                                                                           |
| 56 | <b>dissemination</b>       |                      |                                                                           |
| 57 |                            |                      |                                                                           |
| 58 |                            |                      |                                                                           |
| 59 |                            |                      |                                                                           |
| 60 |                            |                      |                                                                           |

|    |                                             |                      |                                                                                                                                                                                                                                                                                     |                         |
|----|---------------------------------------------|----------------------|-------------------------------------------------------------------------------------------------------------------------------------------------------------------------------------------------------------------------------------------------------------------------------------|-------------------------|
| 1  | Research ethics approval                    | <a href="#">#24</a>  | Plans for seeking research ethics committee / institutional review board (REC / IRB) approval                                                                                                                                                                                       | 3                       |
| 2  |                                             |                      |                                                                                                                                                                                                                                                                                     |                         |
| 3  |                                             |                      |                                                                                                                                                                                                                                                                                     |                         |
| 4  |                                             |                      |                                                                                                                                                                                                                                                                                     |                         |
| 5  | Protocol amendments                         | <a href="#">#25</a>  | Plans for communicating important protocol modifications (eg, changes to eligibility criteria, outcomes, analyses) to relevant parties (eg, investigators, REC / IRBs, trial participants, trial registries, journals, regulators)                                                  | N/A – educational trial |
| 6  |                                             |                      |                                                                                                                                                                                                                                                                                     |                         |
| 7  |                                             |                      |                                                                                                                                                                                                                                                                                     |                         |
| 8  |                                             |                      |                                                                                                                                                                                                                                                                                     |                         |
| 9  |                                             |                      |                                                                                                                                                                                                                                                                                     |                         |
| 10 |                                             |                      |                                                                                                                                                                                                                                                                                     |                         |
| 11 | Consent or assent                           | <a href="#">#26a</a> | Who will obtain informed consent or assent from potential trial participants or authorised surrogates, and how (see Item 32)                                                                                                                                                        | 9                       |
| 12 |                                             |                      |                                                                                                                                                                                                                                                                                     |                         |
| 13 |                                             |                      |                                                                                                                                                                                                                                                                                     |                         |
| 14 |                                             |                      |                                                                                                                                                                                                                                                                                     |                         |
| 15 |                                             |                      |                                                                                                                                                                                                                                                                                     |                         |
| 16 |                                             |                      |                                                                                                                                                                                                                                                                                     |                         |
| 17 | Consent or assent: ancillary studies        | <a href="#">#26b</a> | Additional consent provisions for collection and use of participant data and biological specimens in ancillary studies, if applicable                                                                                                                                               | N/A – educational trial |
| 18 |                                             |                      |                                                                                                                                                                                                                                                                                     |                         |
| 19 |                                             |                      |                                                                                                                                                                                                                                                                                     |                         |
| 20 |                                             |                      |                                                                                                                                                                                                                                                                                     |                         |
| 21 |                                             |                      |                                                                                                                                                                                                                                                                                     |                         |
| 22 | Confidentiality                             | <a href="#">#27</a>  | How personal information about potential and enrolled participants will be collected, shared, and maintained in order to protect confidentiality before, during, and after the trial                                                                                                | 14                      |
| 23 |                                             |                      |                                                                                                                                                                                                                                                                                     |                         |
| 24 |                                             |                      |                                                                                                                                                                                                                                                                                     |                         |
| 25 |                                             |                      |                                                                                                                                                                                                                                                                                     |                         |
| 26 |                                             |                      |                                                                                                                                                                                                                                                                                     |                         |
| 27 | Declaration of interests                    | <a href="#">#28</a>  | Financial and other competing interests for principal investigators for the overall trial and each study site                                                                                                                                                                       | 16                      |
| 28 |                                             |                      |                                                                                                                                                                                                                                                                                     |                         |
| 29 |                                             |                      |                                                                                                                                                                                                                                                                                     |                         |
| 30 |                                             |                      |                                                                                                                                                                                                                                                                                     |                         |
| 31 | Data access                                 | <a href="#">#29</a>  | Statement of who will have access to the final trial dataset, and disclosure of contractual agreements that limit such access for investigators                                                                                                                                     | 14                      |
| 32 |                                             |                      |                                                                                                                                                                                                                                                                                     |                         |
| 33 |                                             |                      |                                                                                                                                                                                                                                                                                     |                         |
| 34 |                                             |                      |                                                                                                                                                                                                                                                                                     |                         |
| 35 |                                             |                      |                                                                                                                                                                                                                                                                                     |                         |
| 36 |                                             |                      |                                                                                                                                                                                                                                                                                     |                         |
| 37 | Ancillary and post trial care               | <a href="#">#30</a>  | Provisions, if any, for ancillary and post-trial care, and for compensation to those who suffer harm from trial participation                                                                                                                                                       | N/A – educational trial |
| 38 |                                             |                      |                                                                                                                                                                                                                                                                                     |                         |
| 39 |                                             |                      |                                                                                                                                                                                                                                                                                     |                         |
| 40 |                                             |                      |                                                                                                                                                                                                                                                                                     |                         |
| 41 |                                             |                      |                                                                                                                                                                                                                                                                                     |                         |
| 42 | Dissemination policy: trial results         | <a href="#">#31a</a> | Plans for investigators and sponsor to communicate trial results to participants, healthcare professionals, the public, and other relevant groups (eg, via publication, reporting in results databases, or other data sharing arrangements), including any publication restrictions | 15                      |
| 43 |                                             |                      |                                                                                                                                                                                                                                                                                     |                         |
| 44 |                                             |                      |                                                                                                                                                                                                                                                                                     |                         |
| 45 |                                             |                      |                                                                                                                                                                                                                                                                                     |                         |
| 46 |                                             |                      |                                                                                                                                                                                                                                                                                     |                         |
| 47 |                                             |                      |                                                                                                                                                                                                                                                                                     |                         |
| 48 |                                             |                      |                                                                                                                                                                                                                                                                                     |                         |
| 49 |                                             |                      |                                                                                                                                                                                                                                                                                     |                         |
| 50 | Dissemination policy: authorship            | <a href="#">#31b</a> | Authorship eligibility guidelines and any intended use of professional writers                                                                                                                                                                                                      | 15                      |
| 51 |                                             |                      |                                                                                                                                                                                                                                                                                     |                         |
| 52 |                                             |                      |                                                                                                                                                                                                                                                                                     |                         |
| 53 |                                             |                      |                                                                                                                                                                                                                                                                                     |                         |
| 54 | Dissemination policy: reproducible research | <a href="#">#31c</a> | Plans, if any, for granting public access to the full protocol, participant-level dataset, and statistical code                                                                                                                                                                     | N/A                     |
| 55 |                                             |                      |                                                                                                                                                                                                                                                                                     |                         |
| 56 |                                             |                      |                                                                                                                                                                                                                                                                                     |                         |
| 57 |                                             |                      |                                                                                                                                                                                                                                                                                     |                         |

## Appendices

|    |                      |                     |                                                               |             |
|----|----------------------|---------------------|---------------------------------------------------------------|-------------|
| 1  | Informed consent     | <a href="#">#32</a> | Model consent form and other related documentation given to   | Appendix    |
| 2  | materials            |                     | participants and authorised surrogates                        |             |
| 3  |                      |                     |                                                               |             |
| 4  | Biological specimens | <a href="#">#33</a> | Plans for collection, laboratory evaluation, and storage of   | N/A –       |
| 5  |                      |                     | biological specimens for genetic or molecular analysis in the | educational |
| 6  |                      |                     | current trial and for future use in ancillary studies, if     | trial       |
| 7  |                      |                     | applicable                                                    |             |
| 8  |                      |                     |                                                               |             |
| 9  |                      |                     |                                                               |             |
| 10 |                      |                     |                                                               |             |

11 None The SPIRIT checklist is distributed under the terms of the Creative Commons Attribution License CC-  
12 BY-ND 3.0. This checklist can be completed online using <https://www.goodreports.org/>, a tool made by the  
13 [EQUATOR Network](#) in collaboration with [Penelope.ai](#)  
14  
15

16  
17  
18  
19  
20  
21  
22  
23  
24  
25  
26  
27  
28  
29  
30  
31  
32  
33  
34  
35  
36  
37  
38  
39  
40  
41  
42  
43  
44  
45  
46  
47  
48  
49  
50  
51  
52  
53  
54  
55  
56  
57  
58  
59  
60

For peer review only

# BMJ Open

## Cadaveric simulation vs standard training for postgraduate trauma & orthopaedic surgical trainees: protocol for the CAD:TRAUMA study multi-centre randomised controlled educational trial

|                                 |                                                                                                                                                                                                                                                                                                                                                                                                                                              |
|---------------------------------|----------------------------------------------------------------------------------------------------------------------------------------------------------------------------------------------------------------------------------------------------------------------------------------------------------------------------------------------------------------------------------------------------------------------------------------------|
| Journal:                        | <i>BMJ Open</i>                                                                                                                                                                                                                                                                                                                                                                                                                              |
| Manuscript ID                   | bmjopen-2020-037319.R2                                                                                                                                                                                                                                                                                                                                                                                                                       |
| Article Type:                   | Protocol                                                                                                                                                                                                                                                                                                                                                                                                                                     |
| Date Submitted by the Author:   | 22-Jul-2020                                                                                                                                                                                                                                                                                                                                                                                                                                  |
| Complete List of Authors:       | James, Hannah; University of Warwick Warwick Medical School, Clinical Trials Unit; University Hospitals Coventry and Warwickshire NHS Trust, Trauma & Orthopaedic Surgery<br>Pattison, Giles; University Hospitals Coventry and Warwickshire NHS Trust, Trauma & Orthopaedic Surgery<br>Fisher, Joanne; University of Warwick Warwick Medical School, Clinical Trials Unit<br>Griffin, Damian; University of Warwick, Warwick Medical School |
| <b>Primary Subject Heading</b>: | Medical education and training                                                                                                                                                                                                                                                                                                                                                                                                               |
| Secondary Subject Heading:      | Surgery                                                                                                                                                                                                                                                                                                                                                                                                                                      |
| Keywords:                       | MEDICAL EDUCATION & TRAINING, ORTHOPAEDIC & TRAUMA SURGERY, Trauma management < ORTHOPAEDIC & TRAUMA SURGERY                                                                                                                                                                                                                                                                                                                                 |
|                                 |                                                                                                                                                                                                                                                                                                                                                                                                                                              |

SCHOLARONE™  
Manuscripts

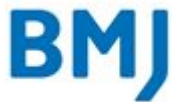

I, the Submitting Author has the right to grant and does grant on behalf of all authors of the Work (as defined in the below author licence), an exclusive licence and/or a non-exclusive licence for contributions from authors who are: i) UK Crown employees; ii) where BMJ has agreed a CC-BY licence shall apply, and/or iii) in accordance with the terms applicable for US Federal Government officers or employees acting as part of their official duties; on a worldwide, perpetual, irrevocable, royalty-free basis to BMJ Publishing Group Ltd ("BMJ") its licensees and where the relevant Journal is co-owned by BMJ to the co-owners of the Journal, to publish the Work in this journal and any other BMJ products and to exploit all rights, as set out in our [licence](#).

The Submitting Author accepts and understands that any supply made under these terms is made by BMJ to the Submitting Author unless you are acting as an employee on behalf of your employer or a postgraduate student of an affiliated institution which is paying any applicable article publishing charge ("APC") for Open Access articles. Where the Submitting Author wishes to make the Work available on an Open Access basis (and intends to pay the relevant APC), the terms of reuse of such Open Access shall be governed by a Creative Commons licence – details of these licences and which [Creative Commons](#) licence will apply to this Work are set out in our licence referred to above.

Other than as permitted in any relevant BMJ Author's Self Archiving Policies, I confirm this Work has not been accepted for publication elsewhere, is not being considered for publication elsewhere and does not duplicate material already published. I confirm all authors consent to publication of this Work and authorise the granting of this licence.

1  
2  
3 **Cadaveric simulation vs standard training for postgraduate trauma & orthopaedic surgical**  
4 **trainees: protocol for the CAD:TRAUMA study multi-centre randomised controlled**  
5 **educational trial**  
6  
7  
8  
9

10  
11  
12  
13  
14  
15  
16  
17  
18  
19  
20 Hannah K James<sup>1,2</sup> h.smith.1@warwick.ac.uk  
21

22  
23  
24  
25 Giles T R Pattison<sup>2</sup> Giles.Pattison@uhcw.nhs.uk  
26

27  
28  
29  
30 Joanne D Fisher<sup>1</sup> Joanne.Fisher@warwick.ac.uk  
31

32  
33  
34  
35 Damian R Griffin<sup>1,2</sup> Damian.Griffin@warwick.ac.uk  
36

- 37  
38  
39  
40  
41  
42  
43  
44 1. Clinical Trials Unit, Warwick Medical School, Coventry, CV4 7HL  
45  
46 2. Department of Trauma & Orthopaedic Surgery, University Hospitals Coventry &  
47  
48 Warwickshire, Clifford Bridge Road, Coventry, CV2 2DX  
49  
50

51  
52  
53 Correspondence:

54  
55  
56  
57  
58 Dr HK James  
59  
60

1  
2  
3 Clinical Sciences Research Laboratories

4  
5  
6 Clinical Sciences Building

7  
8 University Hospital Coventry & Warwickshire

9  
10 Clifford Bridge Road

11  
12  
13 Coventry

14  
15 CV2 2DX

16  
17  
18  
19  
20 Tel 07786737479

21  
22  
23  
24  
25 Word Count 3,420

26  
27  
28  
29 Keywords

30  
31  
32  
33  
34 Education, Training, Simulation

35  
36  
37  
38  
39 Abstract

40  
41  
42  
43  
44 **Introduction**

45  
46  
47  
48  
49 The quantity and quality of surgical training in the UK has been negatively affected by  
50  
51 reduced working hours and NHS financial pressures. Traditionally surgical training has  
52  
53 occurred by the master-apprentice model involving a process of graduated responsibility, but  
54  
55 a modern alternative is to use simulation for the early stages of training. It is not known if  
56  
57 simulation training for junior trainees can safeguard patients and improve clinical outcomes.  
58  
59  
60

1  
2  
3 This paper details the protocol for a multicentre randomised controlled educational trial of a  
4  
5  
6 cadaveric simulation training intervention versus standard training for junior postgraduate  
7  
8 orthopaedic surgeons-in-training. This is the first study to assess the effect of cadaveric  
9  
10 simulation training for open surgery on patient outcome. The feasibility of delivering  
11  
12 cadaveric training, use of radiographic and clinical outcome measures to assess impact and  
13  
14 the challenges of upscaling provision will be explored.  
15  
16  
17  
18  
19

## 20 **Methods and Analysis**

21  
22  
23  
24 We will recruit postgraduate orthopaedic surgeons-in-training in the first three years (of  
25  
26 eight) of the specialist training programme. Participants will be block randomised and  
27  
28 allocated to either cadaveric simulation or standard 'on-the-job' training, learning three  
29  
30 common orthopaedic procedures, each of which is a sub-study within the trial. The  
31  
32 procedures are 1) Dynamic Hip Screw(DHS), 2) hemiarthroplasty and 3) ankle fracture  
33  
34 fixation. These procedures have been selected as they are very common procedures which  
35  
36 are routinely performed by junior surgeons-in-training. A pragmatic approach to sample size  
37  
38 is taken in lieu of a formal power calculation as this is novel exploratory work with no a priori  
39  
40 estimate of effect size to reference. The primary outcome measure is the technical success  
41  
42 of the surgery performed on patients by the participating surgeons-in-training during the  
43  
44 follow-up period for the three sub-study procedures, as measured by the implant position on  
45  
46 the post-operative radiograph. The secondary outcome measures are procedure time, post-  
47  
48 operative complication rate and patient health state at 4 months post-operation (EQ-5D –  
49  
50 substudies 1 and 2 only).  
51  
52  
53  
54  
55  
56  
57  
58  
59  
60



## Ethics, registration and dissemination

National research ethics approval was granted for this study by the NHS Research Authority South Birmingham Research Ethics Committee (15/WM/0464). Confidentiality Advisory Group approval was granted for accessing radiographic and outcome data without patient consent on 27 February 2017 (16/CAG/0125). The results of this trial will be submitted to a peer-reviewed journal and will inform educational and clinical practice.

## Trial registration number

ISRCTN20431944; Pre-results

Protocol version V\_P\_1.1

## Article Summary

Strengths and limitations of this study:

- This is the first randomised controlled trial assessing the impact of cadaveric simulation training on clinical outcomes
- Patient-centred outcome measures are used to measure an educational intervention for surgeons

- Multicentre study to maximize external validity of the results
- The training dose is small as cadaveric training is expensive to deliver
- Pragmatic approach to sample size which is limited by the capacity of the surgical training centre

## Introduction

It is imperative that surgeons are trained to a high standard, so they can perform safe and effective operations for patients. The quality and quantity of surgical training in the UK is currently under threat from a 'perfect storm' of factors(1). These include reduced working hours(2, 3), shift based working patterns(4) with the loss of the traditional surgical firm, and a move to expedite training and shorten specialist programmes(5, 6). This is set within a climate of unprecedented financial austerity in the NHS and ever increasing service pressures.

Simulation offers a solution to some of these challenges by moving the early part of the surgical learning curve away from patients into a controlled environment(7), where skills may be more rapidly acquired as compared to the clinical environment. Simulation is also

1  
2  
3 potentially a very efficient way of training, as large numbers of trainees can be trained  
4  
5 simultaneously, at an intensity not feasible in the clinical environment due to competing  
6  
7 service demands.  
8  
9

10  
11  
12 Cadaveric simulation - training using deceased, preserved or fresh human bodies - is a  
13  
14 particularly promising modality for training. Fresh-frozen cadavers retain many of the soft  
15  
16 tissue handling characteristics seen in live patients, and in combination with presenting the  
17  
18 correct anatomy, particularly complex neurovascular relationships, may offer a more realistic  
19  
20 simulated operation than would be possible on a plastic model or virtual reality simulator(8,  
21  
22 9). Cadaveric material does not bleed(10) and hence may be less useful for simulating  
23  
24 procedures where haemorrhage control is an important feature.  
25  
26  
27  
28  
29  
30  
31

32 The operating theatre environment can be simulated, including (but not limited to) surgical  
33  
34 dress, draping, instrumentation and multidisciplinary team. This 'whole dress rehearsal' for  
35  
36 surgery may enhance development of non-technical skills in addition to the technical  
37  
38 operative surgical skills(11).  
39  
40  
41  
42  
43

44 There are several challenges in delivering cadaveric simulation training. It is expensive to  
45  
46 provide(9), particularly when cadaveric material has to be purchased under license where  
47  
48 there is not a local body donation programme. It requires considerable infrastructure to  
49  
50 deliver, including specialist wet laboratory facilities with the appropriately trained staff. These  
51  
52 challenges become particularly pressing when provision of cadaveric training on a large  
53  
54 scale is considered, and are an important driver in the development of high quality evidence  
55  
56  
57  
58  
59  
60

1  
2  
3 of educational impact. This evidence is necessary before considerable financial investment  
4  
5  
6 can be recommended in providing cadaveric simulation training on a larger scale.  
7  
8  
9

10 There is abundant low quality evidence showing cadaveric simulation may induce short term  
11  
12 skill improvement as measured by subjective and behavioural metrics, but there is a lack of  
13  
14 high quality, quantitative evidence that skills learnt in cadaveric simulation can transfer to the  
15  
16 workplace, leading to improved outcomes for patients(8).  
17  
18  
19

20  
21  
22 Our trial attempts to address this evidence deficit, and is both topical and timely.  
23  
24  
25  
26  
27  
28  
29

### 30 Good Clinical Practice

31  
32  
33 This trial will be undertaken in compliance with Good Practice Guidelines, complying with the  
34  
35 Declaration of Helsinki and UK Legislation. Warwick standard operating procedures (SOPs)  
36  
37 will be followed.  
38  
39  
40  
41  
42  
43

### 44 Consolidated Standards of Reporting Trials

45  
46  
47  
48 The results of the trial will be reported in line with the Consolidated Standard of Reporting  
49  
50 (CONSORT) statement(12). This protocol has been written according to the SPIRIT  
51  
52 reporting guidelines(13).  
53  
54  
55  
56  
57

### 58 Aim

1  
2  
3  
4  
5  
6 The aim is to determine which of the two surgical training strategies for junior orthopaedic  
7  
8 surgeons-in-training leads to the best patient outcomes for three common procedures.  
9  
10  
11  
12  
13  
14  
15  
16  
17

### 18 Objectives

- 22 1. To assess the impact of a cadaveric simulation training intervention on the patient  
23  
24 outcome of operations performed by junior orthopaedic surgeons-in-training  
25  
26
- 27 2. To define the early learning curve of DHS, Hemiarthroplasty and ankle fracture  
28  
29 fixation  
30  
31
- 32 3. To explore the feasibility of using post-operative x-rays to assess technical skill  
33  
34  
35  
36  
37  
38  
39

### 40 Methods and Analysis

#### 41 42 43 44 Study design

45  
46  
47  
48 This is a UK multicentre, two-arm, group parallel randomised controlled educational trial  
49  
50  
51  
52

#### 53 54 Sample size

55  
56  
57  
58  
59  
60

1  
2  
3 This trial is the first attempt to objectively measure transfer of open operative skills from  
4  
5  
6 cadaveric simulation into the workplace using patient-based outcome measures. There is no  
7  
8  
9 available estimate of effect size to reference against a priori in determining sample size,  
10  
11 therefore a pragmatic approach to sample size will be taken in lieu of a formal power  
12  
13 calculation. The surgical training centre can accommodate 16 delegates at one time and  
14  
15 financial resources permitted one iteration of the cadaveric training course. Our maximum  
16  
17 sample size is therefore 16 participants in each arm of the study  
18  
19  
20  
21  
22  
23  
24

## 25 Outcome measures

### 26 27 28 29 A) Radiographic outcomes

30  
31  
32  
33  
34 The radiographs will be obtained electronically from hospital servers and the implant position  
35  
36 measured manually using computer software. The operations will be identified  
37  
38 retrospectively by access to the participating surgeons' electronic logbooks. The  
39  
40 measurements vary by operation type and are defined as follows.  
41  
42  
43  
44  
45  
46  
47

### 48 **Sub-study 1: Dynamic Hip Screw**

#### 49 50 51 1. Primary Outcome

- 52  
53     ▪ Tip-Apex distance (in mm)

#### 54 55 56 2. Secondary Outcomes (in order of importance)

- 57  
58     ▪ Lag screw position in the femoral head (defined by Cleveland Zones)

- 1
  - 2
  - 3
  - 4
  - 5
  - 6
  - 7
  - 8
  - 9
  - 10
  - 11
  - 12
  - 13
  - 14
  - 15
  - 16
  - 17
  - 18
  - 19
  - 20
  - 21
  - 22
  - 23
  - 24
  - 25
  - 26
  - 27
  - 28
  - 29
  - 30
  - 31
  - 32
  - 33
  - 34
  - 35
  - 36
  - 37
  - 38
  - 39
  - 40
  - 41
  - 42
  - 43
  - 44
  - 45
  - 46
  - 47
  - 48
  - 49
  - 50
  - 51
  - 52
  - 53
  - 54
  - 55
  - 56
  - 57
  - 58
  - 59
  - 60
- Plate flush to lateral femoral cortex (binary Y/N)
  - 8 cortex hold for plate screws (binary Y/N)

### Sub- study 2: Hemiarthroplasty

1. Primary Outcome
  - Leg length discrepancy (mm)
2. Secondary Outcomes (in order of importance)
  - Femoral stem alignment (degrees off neutral)
  - Cement mantle quality (Barrack grade score)
  - Femoral offset change relative to native hip (mm)

### Sub- study 3: Ankle fracture fixation

1. Primary Outcome
  - Medial clear space (mm)
2. Secondary Outcomes
  - Lateral malleolar displacement (mm)
  - Tibiofibular clear space (mm)
  - Talocrural angle (degrees)
  - Medial malleolar displacement (mm)

### B) Clinical Outcomes

1  
2  
3  
4  
5  
6 The clinical outcome measures for sub-studies 1-3 are;  
7  
8  
9

10 1) Procedure Time  
11  
12  
13  
14

15 Defined as knife-to-skin/surgical start time to wound closure/surgical stop time. These will be  
16  
17 obtained from hospital theatre management systems. Procedure time has been chosen as  
18  
19 an outcome measure as there is evidence in the literature that procedure time is inversely  
20  
21 related to experience, and so can be used as a surrogate measure of technical  
22  
23 proficiency(14)  
24  
25  
26  
27  
28  
29

30 2) Intra-operative radiation dose to patient  
31  
32  
33  
34

35 Defined as time under fluoroscopy (seconds) and radiation dose (mGym<sup>2</sup>). There is  
36  
37 evidence that with increasing experience and skill, surgeons use less intra-operative x-rays  
38  
39 to adjust the position of the fracture and implant(14). Hemiarthroplasty does not require  
40  
41 fluoroscopy so this will not be used as an outcome measure for sub-study 2.  
42  
43  
44  
45  
46

47 3) Post-operative complication rate  
48  
49  
50

51 The complications of interest are the acute post-operative complications during the inpatient  
52  
53 admission. These will be sub-categorised as acute medical complications (hospital acquired  
54  
55 pneumonia, renal complications, cardiac complications, DVT/PE) and surgical complications  
56  
57 (wound infection, wound dehiscence, metalwork failure, deep infection).  
58  
59  
60



1  
2  
3  
4  
5  
6 4) Health state at 4 months post-operation (EQ-5D)  
7  
8  
9

10 Health state at 4-months post-operation will be measured using EQ-5D, which is a  
11  
12 standardized instrument measuring generic health status, which has been widely validated  
13  
14 in clinical trials. This data is being collected separately as part of the WHiTE comprehensive  
15  
16 cohort study of hip fracture patients (ISRCTN63982700) and reported elsewhere(15). EQ-5D  
17  
18 will be used for sub-studies 1 and 2 only as these involve hip fractures.  
19  
20  
21  
22  
23  
24  
25  
26

27 Screening and eligibility  
28  
29  
30  
31

32 Orthopaedic surgeons-in-training in their first, second or third specialist training year in the  
33  
34 West Midlands Workforce Deanery will be eligible to participate in the trial. Eligible trainees  
35  
36 will be identified by liaison with the training programme directors for Trauma & Orthopaedic  
37  
38 surgery in the three West Midlands schools; Warwick, Birmingham and Oswestry. An  
39  
40 invitation email will be sent to all eligible trainees by programme administrators at the  
41  
42 deanery.  
43  
44  
45  
46  
47  
48  
49  
50

51 Inclusion criteria  
52  
53  
54  
55

- 56 1) Trauma & Orthopaedic surgeon-in-training in West Midlands school  
57  
58 (Warwick/Birmingham/Oswestry)  
59  
60

- 1
- 2
- 3
- 4 2) In specialty training year 1-3
- 5
- 6 3) Willing and able to attend a two-day cadaveric simulation training course at the West
- 7
- 8 Midlands Surgical Training Centre, Coventry
- 9

#### 10

#### 11

#### 12

#### 13 Exclusion criteria

#### 14

#### 15

#### 16

#### 17

- 18 1) Unavailable on course dates
- 19
- 20
- 21
- 22
- 23
- 24

#### 25 Consent

#### 26

#### 27

#### 28

#### 29

#### 30 Surgeon participants:

#### 31

#### 32

#### 33

#### 34

35 Potential study participants will be provided with written and verbal information about the  
36 study. Consent will be obtained by the trial team. The right to refuse participation without  
37 giving reasons will be fully respected, and enrolled participants will be free to withdraw from  
38 the study at any time without reason, and without prejudice to their training. All participants  
39 will be provided with the contact information of a team member who can provide further  
40 information about the study. All participants who are allocated to the control group will have  
41 the opportunity to undertake the cadaveric simulation training intervention at the end of the  
42 study follow-up. This provision is being offered so that the control group are not  
43 disadvantaged in their access to educational opportunity by virtue of being randomised to  
44 the control group.  
45  
46  
47  
48  
49  
50  
51  
52  
53  
54  
55  
56  
57  
58  
59  
60

1  
2  
3 Patients whose operations are assessed:  
4  
5  
6  
7

8 Patients who undergo an operation by a surgeon who is participating in the study will not be  
9  
10 separately consented to allow access to radiographs to assess their implant position or  
11  
12 clinical outcome data. Permission to access this information for the purposes of this study  
13  
14 without patient consent has been granted from the confidentiality advisory group  
15  
16 (16/CAG/0125). It is recognised that seeking consent from a group of primarily elderly, frail  
17  
18 patients to assess low risk, routine clinical data in a secure manner for a trial they are not  
19  
20 directly participating in would be unduly burdensome for the patients. All patient data will be  
21  
22 fully anonymised and handled securely in line with university data regulations.  
23  
24  
25  
26  
27  
28  
29

### 30 Randomisation

31  
32  
33

34 Participants will be randomised at the point of recruitment using block randomisation (block  
35  
36 size 4) to generate a random sequence list, to which participants will be assigned in the  
37  
38 order that they enter the study. The allocation sequence will be generated by a senior  
39  
40 medical statistician, participants will be enrolled by the trial team.  
41  
42  
43  
44  
45  
46  
47  
48

### 49 Postrandomisation withdrawals

50  
51  
52

53 Withdrawn participants will not be replaced.  
54  
55  
56  
57

### 58 Study setting

59  
60

1  
2  
3  
4  
5  
6 The study participants will be on training rotations within the regional hospitals of the West  
7  
8 Midlands during the study follow-up. The hospitals where trainees have been working, and  
9  
10 performing operations, during the study follow up will be identified from the participants  
11  
12 electronic surgical logbook records.  
13  
14  
15  
16  
17  
18  
19

## 20 Interventions

### 21 22 23 24 25 Control group

26  
27  
28  
29  
30 The control group will undertake standard residency training according to the master-  
31  
32 apprentice model, which is the current standard practice in UK. No additional training or  
33  
34 access to learning materials will be provided beyond the fortnightly didactic teaching  
35  
36 sessions which are delivered as a part of routine training.  
37  
38  
39  
40

### 41 42 Intervention group (cadaveric simulation trained)

43  
44  
45  
46 Participants allocated to the intervention group will receive an intensive, 2-day cadaveric  
47  
48 simulation training course at the start of the training year, where 4 common orthopaedic  
49  
50 surgical procedures will be taught (DHS, hemiarthroplasty, ankle fracture fixation and lower  
51  
52 limb fasciotomy). All intervention participants will receive training on all 4 procedures, which  
53  
54 will be considered separately in the analysis as individual sub-studies (as they have different  
55  
56 radiographic outcome measures). The fasciotomy procedure is included as a 'filler' to make  
57  
58  
59  
60

1  
2  
3 the course structure work, and chosen because it is an important high-stakes, anatomically  
4  
5  
6 critical operation that is rarely performed by trainees. Outcomes related to the fasciotomy  
7  
8 procedure will not be collected or included in the analysis.  
9

#### 10 11 12 13 14 15 The cadaveric simulation training course 16

17  
18  
19  
20 The course will be delivered in September at the start of the surgical training year (which  
21  
22 runs August to August). The course will take place at the West Midlands Surgical Training  
23  
24 Centre (WMSTC) at the University Hospital Coventry & Warwickshire (UHCW). The WMSTC  
25  
26 is a specialized wet-laboratory facility for delivering cadaveric training, and has an  
27  
28 experienced dedicated faculty to facilitate training delivery.  
29  
30  
31

32  
33  
34 The course will consist of two full days of teaching, with expert consultant faculty teaching on  
35  
36 fresh-frozen hemi-cadavers (waist-to-toe-tip). The participant:faculty ratio will be 2:1, and  
37  
38 participant:cadaver ratio will be 2:1. Each participant will undertake each of the four  
39  
40 procedures in their entirety as primary surgeon('skin-to-skin'), and will act as assistant when  
41  
42 their partner is the primary surgeon four times. Hence each participant is exposed to eight  
43  
44 procedures during the course:  
45  
46  
47  
48  
49  
50  
51

52  
53 The environment and psychological fidelity of the simulation will be maximised by providing;  
54  
55

- 56  
57  
58 • Full surgical dress including masks, gloves, gowns and lead x-ray aprons  
59  
60

- The usual disposable surgical drapes
- Skin preparation (iodine solution) to prepare the surgical site, and participants and faculty will be asked to observe the usual sterile field precautions as in real theatre
- Full surgical instrument trays, surgical implants and cement (for hemiarthroplasty) of the same type as in real theatre will be used
- Image intensifier (mobile x-ray) will be available for intra-operative use
- Background noise levels and room temperature were maintained at what would usually be expected in the operating theatre

The simulated operating theatres will be set up within the WMSTC as two parallel round-robin circuits. The two stations requiring x-ray use (DHS and ankle ORIF) will be set up at the far end of the room to create a radiation zone and where appropriate, standard precautions will be used. Careful consideration will be given to the optimum sequential use of the cadaveric specimens in planning the course structure. For example, it is necessary that the DHS station precedes the hemiarthroplasty station as it would obviously not be possible to perform a DHS operation when the femoral head had been removed. Similarly, the fasciotomy incisions would compromise the soft tissue envelope of the lower limb to a sufficient degree that the fidelity of the ankle ORIF station would be compromised. It is important to make the best and most efficient use of the cadaveric material, for both ethical and financial reasons.

Blinding

1  
2  
3 The participants cannot be blinded to the type of training they receive, neither can the trial  
4  
5 team in organising the cadaveric simulation training. The trial team will take no part in the  
6  
7 training of participants. The assessment of radiographic images will be made blinded to  
8  
9 group allocation.  
10  
11  
12  
13  
14

#### 15 Adverse event management

16  
17  
18  
19  
20 In the unlikely event of a serious adverse event (SAE), the chief investigator will report to the  
21  
22 sponsor (University of Warwick), ethics committee and project supervisors.  
23  
24  
25  
26

#### 27 Patient and public involvement

28  
29  
30  
31  
32 There was no direct patient or public involvement in the design of the study, although clearly  
33  
34 training competent surgeons is in the public interest. There is qualitative work to be done  
35  
36 around this trial to better understand patient expectations of surgical training.  
37  
38  
39  
40

#### 41 End of trial

42  
43  
44  
45  
46 The trial will end when all the radiographic and clinical outcome data has been collected  
47  
48 from the participating sites. The trial will be stopped prematurely if required by the ethics  
49  
50 committee, following recommendations from the sponsor, or if funding for the study is  
51  
52 withdrawn. The research ethics committee and confidentiality advisory group will be notified  
53  
54 in writing once the trial is complete.  
55  
56  
57  
58  
59  
60

## Trial Oversight

This trial is being undertaken as part of a doctoral research project (HKJ), and supervised by three senior supervisors (DG, JF, GTRP). The supervisors will act as the trial management group and steering committee. The trial is being conducted within a registered Clinical Trials Unit, and will follow the CTU standard operating procedures.

## Data Collection Plan

Data on the numbers of procedures performed by the participating surgeons at baseline will be collected. The operations performed by the participants during study follow-up will be identified by the surgeons' electronic logbook. Only procedures coded as 'S-TS: supervised-trainer scrubbed' or 'STU: supervised trainer unscrubbed' will be included in the analysis.

This is to ensure that only procedures where the trainee has performed the key parts (S-TS) or the entire procedure (STU) are included. If further information on supervisor input/takeover is required this can be obtained by accessing the corresponding procedure based assessment (PBA) record for the operation. PBAs are routinely collected as part of training.

Procedure data will be extracted and anonymised to study identifier by the electronic logbook data team, before being sent to the trial team. The data will include operation type, date, hospital, hospital ID, patient age, American Society of Anaesthesiologists Grade and supervision code. The radiographs and clinical outcome data relating to these procedures will then be obtained from the study sites via liaison with the respective Research &



1  
2  
3  
4 Development Departments. Data will be entered into a secure trial database on a  
5  
6 professionally encrypted trial-specific computer, fully anonymised with only study identifiers.  
7

8  
9 Once data collection is complete, and prior to analysis, range checks for data values will be  
10  
11 undertaken, and data will be double checked on entry to the statistical software package.  
12

13  
14 The project supervisors will act as the data monitoring committee. No interim analysis will be  
15  
16 undertaken. The trial team and statistician will have access to the final trial dataset.  
17

### 18 19 20 Statistical Analysis Plan 21

22  
23  
24  
25 Baseline data including completed months of training and number of prior procedures  
26  
27 performed will be summarised and compared between the two arms of the study. A  
28  
29 CONSORT chart showing the flow of participants through the study will be produced.  
30

31  
32 The three taught procedures (substudies 1-3) will be analysed and reported individually.  
33  
34

35  
36  
37 The main analysis will investigate and report differences between the two groups with  
38  
39 respect to the implant positions (as measured from radiographs), the procedure times, the  
40  
41 intra-operative radiation dose to the patient, and patient outcomes, as measured by post-  
42  
43 operative complications and health state at 4 months post-operation (hip fractures only).  
44  
45

46  
47  
48  
49 Statistical tests will be two-sided and considered to demonstrate a significant difference  
50  
51 when  $p < 0.05$ . Temporal trends by group for implant position, procedure time and radiation  
52  
53 dose will be presented. Linear mixed effects models will be fitted to allow for within-surgeon  
54  
55 correlation between repeated observations (surgeon clustering as a random effect), and to  
56  
57 adjust for important co-variables such as patient condition, age and surgeon experience.  
58  
59  
60

1  
2  
3 These will be summarised by plotting individual learning curves, and then modelled to  
4  
5  
6 estimate the overall learning curves for the two arms of the study.  
7  
8  
9

10 Descriptive statistical analyses of between-group comparisons will be presented for  
11  
12 complication rate and health state, with temporal analysis of the latter being reported if  
13  
14 appropriate and feasible. The statistical analysis will be supervised and checked by a senior  
15  
16 medical statistician at Warwick University.  
17  
18  
19

20  
21  
22 In the event of missing data, statistician advice will be sought on multiple imputation.  
23  
24  
25

## 26 27 Ethics and dissemination 28 29 30

31  
32 Master-apprentice 'on-the-job' training for surgeons is the current training standard in the  
33  
34 UK(10, 16), and therefore the control arm of the study reflects usual practice. The cadaveric  
35  
36 simulation training intervention is an experimental educational intervention and does not  
37  
38 expose trial participants to any substantial risks of harm. The trial results will be reported in  
39  
40 accordance with the CONSORT statement, and disseminated through publication in peer  
41  
42 reviewed journals and conferences. The results of the trial will be presented to Health  
43  
44 Education England and the Royal Surgical College. The dataset, statistical code and  
45  
46 technical appendices will be made available on request to the corresponding author. The  
47  
48 study was approved by the NHS Research Authority South Birmingham Research Ethics  
49  
50 Committee (15/WM/0464).  
51  
52  
53  
54  
55  
56  
57

## 58 Funding 59 60

1  
2  
3  
4  
5  
6 This work was supported by Versus Arthritis grant number 20845  
7  
8  
9

10 Sponsor Contact Information  
11  
12  
13  
14

15 Mrs Jane Prewitt, University of Warwick, Research & Impact Services, University House,  
16  
17 Kirby Corner Road, Coventry, CV4 8UW  
18  
19

20  
21  
22  
23 wmsponsorship@warwick.ac.uk  
24  
25  
26  
27  
28

29 Declaration/Conflict of Interests  
30  
31

32 None to declare  
33  
34  
35  
36  
37  
38  
39  
40  
41  
42  
43  
44  
45  
46  
47  
48  
49  
50  
51  
52  
53  
54  
55  
56  
57  
58

59 References:  
60

1. Temple J. Time for Training. A Review of the impact of the European Working Time Directive on the quality of training. London: Medical Education England; 2010.
2. Maxwell AJ, Crocker M, Jones TL, Bhagawati D, Papadopoulos MC, Bell BA. Implementation of the European Working Time Directive in neurosurgery reduces continuity of care and training opportunities. *Acta Neurochirurgica*. 2010;152(7):1207-10.
3. Pickersgill T. The European working time directive for doctors in training. *BMJ*. 2001;323(7324):1266.
4. Marron C, Byrnes C, Kirk S. An EWTD-compliant shift rota decreases training opportunities. *Bulletin of the Royal College of Surgeons of England*. 2005;87(7):246-8.
5. Training So. Report from the UK Shape of Training Steering Group (UKSTSG). General Medical Council; 2017.
6. England RCoSo. Improving Surgical Training - Trainee Prospectus. London: The Royal College of Surgeons; 2018.
7. Curran I. A Framework for Technology Enhanced Learning. London: Department of Health; 2011.
8. James H, Chapman A, Pattison G, Griffin DR, Fisher J. Current status of Cadaveric Simulation for surgical training: a Systematic Review. *British Journal of Surgery*. 2019.
9. Gilbody J, Prasthofer A, Ho K, Costa M. The use and effectiveness of cadaveric workshops in higher surgical training: a systematic review. *Annals of the Royal College of Surgeons of England*. 2011;93(5):347-56.
10. Reznick RK, MacRae H. Teaching surgical skills--changes in the wind. *N Engl J Med*. 2006;355(25):2664-9.
11. James H, Pattison G, Griffin D, Fisher J. How does cadaveric simulation influence learning in Orthopedic residents? *Journal of Surgical Education*. 2020;In Press.
12. Schulz KF, Altman DG, Moher D. CONSORT 2010 Statement: updated guidelines for reporting parallel group randomised trials. *BMJ*. 2010;340.
13. Chan A-W, Tetzlaff JM, Altman DG, Laupacis A, Gøtzsche PC, Krleža-Jerić K, et al. SPIRIT 2013 Statement: Defining Standard Protocol Items for Clinical Trials. *Annals of Internal Medicine*. 2013;158(3):200-7.
14. James H, Chapman A, Pattison G, Fisher JG, Griffin DR. Assessment of technical skill acquisition and operative competence in Trauma and Orthopaedic surgical training: A systematic review. *JBJS(Am) Reviews*. 2019.
15. Costa ML, Griffin XL, Achten J, Metcalfe D, Judge A, Pinedo-Villanueva R, et al. World Hip Trauma Evaluation (WHiTE): framework for embedded comprehensive cohort studies. *BMJ Open*. 2016;6(10):e011679.
16. Hargreaves DH, Bowditch MG, Griffin DR. On-the-job training for surgeons. 1 ed. London: The Royal Society of Medicine Press; 1997.

#### Author Statement/Contributions

HKJ designed the study and wrote the manuscript

GTRP co-designed the study and the intervention and edited the manuscript

1  
2  
3 JDF edited the manuscript, made a substantial contribution to the design and is lead  
4 supervisor for the qualitative part of the project  
5  
6 DG co-designed the study, edited draft protocols and is lead supervisor for the  
7 quantitative part of the project  
8  
9

10  
11 Acknowledgements  
12

13  
14 None  
15  
16  
17  
18  
19  
20  
21  
22  
23  
24  
25  
26  
27  
28  
29  
30  
31  
32  
33  
34  
35  
36  
37  
38  
39  
40  
41  
42  
43  
44  
45  
46  
47  
48  
49  
50  
51  
52  
53  
54  
55  
56  
57  
58  
59  
60

For peer review only

# Reporting checklist for protocol of a clinical trial.

Based on the SPIRIT guidelines.

## Instructions to authors

Complete this checklist by entering the page numbers from your manuscript where readers will find each of the items listed below.

Your article may not currently address all the items on the checklist. Please modify your text to include the missing information. If you are certain that an item does not apply, please write "n/a" and provide a short explanation.

Upload your completed checklist as an extra file when you submit to a journal.

In your methods section, say that you used the SPIRIT reporting guidelines, and cite them as:

Chan A-W, Tetzlaff JM, Altman DG, Laupacis A, Gøtzsche PC, Krleža-Jerić K, Hróbjartsson A, Mann H, Dickersin K, Berlin J, Doré C, Parulekar W, Summerskill W, Groves T, Schulz K, Sox H, Rockhold FW, Rennie D, Moher D. SPIRIT 2013 Statement: Defining standard protocol items for clinical trials. *Ann Intern Med.* 2013;158(3):200-207

|                                             |                     | Reporting Item                                                                                               | Page Number |
|---------------------------------------------|---------------------|--------------------------------------------------------------------------------------------------------------|-------------|
| <b>Administrative information</b>           |                     |                                                                                                              |             |
| Title                                       | <a href="#">#1</a>  | Descriptive title identifying the study design, population, interventions, and, if applicable, trial acronym | 1           |
| Trial registration                          | <a href="#">#2a</a> | Trial identifier and registry name. If not yet registered, name of intended registry                         | 3           |
| Trial registration: data set                | <a href="#">#2b</a> | All items from the World Health Organization Trial Registration Data Set                                     | 3           |
| Protocol version                            | <a href="#">#3</a>  | Date and version identifier                                                                                  | 3           |
| Funding                                     | <a href="#">#4</a>  | Sources and types of financial, material, and other support                                                  | 15          |
| Roles and responsibilities: contributorship | <a href="#">#5a</a> | Names, affiliations, and roles of protocol contributors                                                      | 1           |

|    |                           |                     |                                                                   |     |
|----|---------------------------|---------------------|-------------------------------------------------------------------|-----|
| 1  | Roles and                 | <a href="#">#5b</a> | Name and contact information for the trial sponsor                | 15  |
| 2  | responsibilities:         |                     |                                                                   |     |
| 3  | sponsor contact           |                     |                                                                   |     |
| 4  | information               |                     |                                                                   |     |
| 5  |                           |                     |                                                                   |     |
| 6  |                           |                     |                                                                   |     |
| 7  |                           |                     |                                                                   |     |
| 8  | Roles and                 | <a href="#">#5c</a> | Role of study sponsor and funders, if any, in study design;       | 14  |
| 9  | responsibilities:         |                     | collection, management, analysis, and interpretation of data;     |     |
| 10 | sponsor and funder        |                     | writing of the report; and the decision to submit the report for  |     |
| 11 |                           |                     | publication, including whether they will have ultimate            |     |
| 12 |                           |                     | authority over any of these activities                            |     |
| 13 |                           |                     |                                                                   |     |
| 14 |                           |                     |                                                                   |     |
| 15 |                           |                     |                                                                   |     |
| 16 | Roles and                 | <a href="#">#5d</a> | Composition, roles, and responsibilities of the coordinating      | 14  |
| 17 | responsibilities:         |                     | centre, steering committee, endpoint adjudication committee,      |     |
| 18 | committees                |                     | data management team, and other individuals or groups             |     |
| 19 |                           |                     | overseeing the trial, if applicable (see Item 21a for data        |     |
| 20 |                           |                     | monitoring committee)                                             |     |
| 21 |                           |                     |                                                                   |     |
| 22 |                           |                     |                                                                   |     |
| 23 |                           |                     |                                                                   |     |
| 24 | <b>Introduction</b>       |                     |                                                                   |     |
| 25 |                           |                     |                                                                   |     |
| 26 |                           |                     |                                                                   |     |
| 27 | Background and            | <a href="#">#6a</a> | Description of research question and justification for            | 1   |
| 28 | rationale                 |                     | undertaking the trial, including summary of relevant studies      |     |
| 29 |                           |                     | (published and unpublished) examining benefits and harms          |     |
| 30 |                           |                     | for each intervention                                             |     |
| 31 |                           |                     |                                                                   |     |
| 32 |                           |                     |                                                                   |     |
| 33 |                           |                     |                                                                   |     |
| 34 | Background and            | <a href="#">#6b</a> | Explanation for choice of comparators                             | 11  |
| 35 | rationale: choice of      |                     |                                                                   |     |
| 36 | comparators               |                     |                                                                   |     |
| 37 |                           |                     |                                                                   |     |
| 38 |                           |                     |                                                                   |     |
| 39 | Objectives                | <a href="#">#7</a>  | Specific objectives or hypotheses                                 | 5-6 |
| 40 |                           |                     |                                                                   |     |
| 41 | Trial design              | <a href="#">#8</a>  | Description of trial design including type of trial (eg, parallel | 5   |
| 42 |                           |                     | group, crossover, factorial, single group), allocation ratio, and |     |
| 43 |                           |                     | framework (eg, superiority, equivalence, non-inferiority,         |     |
| 44 |                           |                     | exploratory)                                                      |     |
| 45 |                           |                     |                                                                   |     |
| 46 |                           |                     |                                                                   |     |
| 47 |                           |                     |                                                                   |     |
| 48 | <b>Methods:</b>           |                     |                                                                   |     |
| 49 | <b>Participants,</b>      |                     |                                                                   |     |
| 50 | <b>interventions, and</b> |                     |                                                                   |     |
| 51 | <b>outcomes</b>           |                     |                                                                   |     |
| 52 |                           |                     |                                                                   |     |
| 53 |                           |                     |                                                                   |     |
| 54 |                           |                     |                                                                   |     |
| 55 | Study setting             | <a href="#">#9</a>  | Description of study settings (eg, community clinic, academic     | 10  |
| 56 |                           |                     | hospital) and list of countries where data will be collected.     |     |
| 57 |                           |                     | Reference to where list of study sites can be obtained            |     |
| 58 |                           |                     |                                                                   |     |
| 59 |                           |                     |                                                                   |     |
| 60 |                           |                     |                                                                   |     |

|    |                      |                      |                                                                                                                                                                                                                                                                                                                                                                                |                         |
|----|----------------------|----------------------|--------------------------------------------------------------------------------------------------------------------------------------------------------------------------------------------------------------------------------------------------------------------------------------------------------------------------------------------------------------------------------|-------------------------|
| 1  | Eligibility criteria | <a href="#">#10</a>  | Inclusion and exclusion criteria for participants. If applicable, eligibility criteria for study centres and individuals who will perform the interventions (eg, surgeons, psychotherapists)                                                                                                                                                                                   | 9                       |
| 2  |                      |                      |                                                                                                                                                                                                                                                                                                                                                                                |                         |
| 3  |                      |                      |                                                                                                                                                                                                                                                                                                                                                                                |                         |
| 4  |                      |                      |                                                                                                                                                                                                                                                                                                                                                                                |                         |
| 5  |                      |                      |                                                                                                                                                                                                                                                                                                                                                                                |                         |
| 6  | Interventions:       | <a href="#">#11a</a> | Interventions for each group with sufficient detail to allow replication, including how and when they will be administered                                                                                                                                                                                                                                                     | 11-13                   |
| 7  | description          |                      |                                                                                                                                                                                                                                                                                                                                                                                |                         |
| 8  |                      |                      |                                                                                                                                                                                                                                                                                                                                                                                |                         |
| 9  |                      |                      |                                                                                                                                                                                                                                                                                                                                                                                |                         |
| 10 |                      |                      |                                                                                                                                                                                                                                                                                                                                                                                |                         |
| 11 | Interventions:       | <a href="#">#11b</a> | Criteria for discontinuing or modifying allocated interventions for a given trial participant (eg, drug dose change in response to harms, participant request, or improving / worsening disease)                                                                                                                                                                               | N/A – educational trial |
| 12 | modifications        |                      |                                                                                                                                                                                                                                                                                                                                                                                |                         |
| 13 |                      |                      |                                                                                                                                                                                                                                                                                                                                                                                |                         |
| 14 |                      |                      |                                                                                                                                                                                                                                                                                                                                                                                |                         |
| 15 |                      |                      |                                                                                                                                                                                                                                                                                                                                                                                |                         |
| 16 |                      |                      |                                                                                                                                                                                                                                                                                                                                                                                |                         |
| 17 |                      |                      |                                                                                                                                                                                                                                                                                                                                                                                |                         |
| 18 | Interventions:       | <a href="#">#11c</a> | Strategies to improve adherence to intervention protocols, and any procedures for monitoring adherence (eg, drug tablet return; laboratory tests)                                                                                                                                                                                                                              | N/A – educational trial |
| 19 | adherence            |                      |                                                                                                                                                                                                                                                                                                                                                                                |                         |
| 20 |                      |                      |                                                                                                                                                                                                                                                                                                                                                                                |                         |
| 21 |                      |                      |                                                                                                                                                                                                                                                                                                                                                                                |                         |
| 22 |                      |                      |                                                                                                                                                                                                                                                                                                                                                                                |                         |
| 23 |                      |                      |                                                                                                                                                                                                                                                                                                                                                                                |                         |
| 24 | Interventions:       | <a href="#">#11d</a> | Relevant concomitant care and interventions that are permitted or prohibited during the trial                                                                                                                                                                                                                                                                                  | N/A – educational trial |
| 25 | concomitant care     |                      |                                                                                                                                                                                                                                                                                                                                                                                |                         |
| 26 |                      |                      |                                                                                                                                                                                                                                                                                                                                                                                |                         |
| 27 |                      |                      |                                                                                                                                                                                                                                                                                                                                                                                |                         |
| 28 |                      |                      |                                                                                                                                                                                                                                                                                                                                                                                |                         |
| 29 | Outcomes             | <a href="#">#12</a>  | Primary, secondary, and other outcomes, including the specific measurement variable (eg, systolic blood pressure), analysis metric (eg, change from baseline, final value, time to event), method of aggregation (eg, median, proportion), and time point for each outcome. Explanation of the clinical relevance of chosen efficacy and harm outcomes is strongly recommended | 6-7                     |
| 30 |                      |                      |                                                                                                                                                                                                                                                                                                                                                                                |                         |
| 31 |                      |                      |                                                                                                                                                                                                                                                                                                                                                                                |                         |
| 32 |                      |                      |                                                                                                                                                                                                                                                                                                                                                                                |                         |
| 33 |                      |                      |                                                                                                                                                                                                                                                                                                                                                                                |                         |
| 34 |                      |                      |                                                                                                                                                                                                                                                                                                                                                                                |                         |
| 35 |                      |                      |                                                                                                                                                                                                                                                                                                                                                                                |                         |
| 36 |                      |                      |                                                                                                                                                                                                                                                                                                                                                                                |                         |
| 37 |                      |                      |                                                                                                                                                                                                                                                                                                                                                                                |                         |
| 38 |                      |                      |                                                                                                                                                                                                                                                                                                                                                                                |                         |
| 39 |                      |                      |                                                                                                                                                                                                                                                                                                                                                                                |                         |
| 40 | Participant timeline | <a href="#">#13</a>  | Time schedule of enrolment, interventions (including any run-ins and washouts), assessments, and visits for participants. A schematic diagram is highly recommended (see Figure)                                                                                                                                                                                               | 11                      |
| 41 |                      |                      |                                                                                                                                                                                                                                                                                                                                                                                |                         |
| 42 |                      |                      |                                                                                                                                                                                                                                                                                                                                                                                |                         |
| 43 |                      |                      |                                                                                                                                                                                                                                                                                                                                                                                |                         |
| 44 |                      |                      |                                                                                                                                                                                                                                                                                                                                                                                |                         |
| 45 |                      |                      |                                                                                                                                                                                                                                                                                                                                                                                |                         |
| 46 |                      |                      |                                                                                                                                                                                                                                                                                                                                                                                |                         |
| 47 | Sample size          | <a href="#">#14</a>  | Estimated number of participants needed to achieve study objectives and how it was determined, including clinical and statistical assumptions supporting any sample size calculations                                                                                                                                                                                          | 6                       |
| 48 |                      |                      |                                                                                                                                                                                                                                                                                                                                                                                |                         |
| 49 |                      |                      |                                                                                                                                                                                                                                                                                                                                                                                |                         |
| 50 |                      |                      |                                                                                                                                                                                                                                                                                                                                                                                |                         |
| 51 |                      |                      |                                                                                                                                                                                                                                                                                                                                                                                |                         |
| 52 |                      |                      |                                                                                                                                                                                                                                                                                                                                                                                |                         |
| 53 |                      |                      |                                                                                                                                                                                                                                                                                                                                                                                |                         |
| 54 | Recruitment          | <a href="#">#15</a>  | Strategies for achieving adequate participant enrolment to reach target sample size                                                                                                                                                                                                                                                                                            | 8                       |
| 55 |                      |                      |                                                                                                                                                                                                                                                                                                                                                                                |                         |
| 56 |                      |                      |                                                                                                                                                                                                                                                                                                                                                                                |                         |
| 57 |                      |                      |                                                                                                                                                                                                                                                                                                                                                                                |                         |
| 58 |                      |                      |                                                                                                                                                                                                                                                                                                                                                                                |                         |
| 59 |                      |                      |                                                                                                                                                                                                                                                                                                                                                                                |                         |
| 60 |                      |                      |                                                                                                                                                                                                                                                                                                                                                                                |                         |



**Methods:****Assignment of interventions (for controlled trials)**

|                                          |                      |                                                                                                                                                                                                                                                                                                                                                          |                         |
|------------------------------------------|----------------------|----------------------------------------------------------------------------------------------------------------------------------------------------------------------------------------------------------------------------------------------------------------------------------------------------------------------------------------------------------|-------------------------|
| Allocation: sequence generation          | <a href="#">#16a</a> | Method of generating the allocation sequence (eg, computer-generated random numbers), and list of any factors for stratification. To reduce predictability of a random sequence, details of any planned restriction (eg, blocking) should be provided in a separate document that is unavailable to those who enrol participants or assign interventions | 10                      |
| Allocation concealment mechanism         | <a href="#">#16b</a> | Mechanism of implementing the allocation sequence (eg, central telephone; sequentially numbered, opaque, sealed envelopes), describing any steps to conceal the sequence until interventions are assigned                                                                                                                                                | 10                      |
| Allocation: implementation               | <a href="#">#16c</a> | Who will generate the allocation sequence, who will enrol participants, and who will assign participants to interventions                                                                                                                                                                                                                                | 10                      |
| Blinding (masking)                       | <a href="#">#17a</a> | Who will be blinded after assignment to interventions (eg, trial participants, care providers, outcome assessors, data analysts), and how                                                                                                                                                                                                                | 13                      |
| Blinding (masking): emergency unblinding | <a href="#">#17b</a> | If blinded, circumstances under which unblinding is permissible, and procedure for revealing a participant's allocated intervention during the trial                                                                                                                                                                                                     | N/A - educational trial |

**Methods: Data collection, management, and analysis**

|                                 |                      |                                                                                                                                                                                                                                                                                                                                                                                                              |    |
|---------------------------------|----------------------|--------------------------------------------------------------------------------------------------------------------------------------------------------------------------------------------------------------------------------------------------------------------------------------------------------------------------------------------------------------------------------------------------------------|----|
| Data collection plan            | <a href="#">#18a</a> | Plans for assessment and collection of outcome, baseline, and other trial data, including any related processes to promote data quality (eg, duplicate measurements, training of assessors) and a description of study instruments (eg, questionnaires, laboratory tests) along with their reliability and validity, if known. Reference to where data collection forms can be found, if not in the protocol | 14 |
| Data collection plan: retention | <a href="#">#18b</a> | Plans to promote participant retention and complete follow-up, including list of any outcome data to be collected for                                                                                                                                                                                                                                                                                        | 14 |

participants who discontinue or deviate from intervention protocols

|    |                            |                      |                                                                           |
|----|----------------------------|----------------------|---------------------------------------------------------------------------|
| 1  |                            |                      |                                                                           |
| 2  |                            |                      |                                                                           |
| 3  |                            |                      |                                                                           |
| 4  | Data management            | <a href="#">#19</a>  | Plans for data entry, coding, security, and storage, including 14         |
| 5  |                            |                      | any related processes to promote data quality (eg, double data            |
| 6  |                            |                      | entry; range checks for data values). Reference to where                  |
| 7  |                            |                      | details of data management procedures can be found, if not in             |
| 8  |                            |                      | the protocol                                                              |
| 9  |                            |                      |                                                                           |
| 10 |                            |                      |                                                                           |
| 11 |                            |                      |                                                                           |
| 12 | Statistics: outcomes       | <a href="#">#20a</a> | Statistical methods for analysing primary and secondary 14-15             |
| 13 |                            |                      | outcomes. Reference to where other details of the statistical             |
| 14 |                            |                      | analysis plan can be found, if not in the protocol                        |
| 15 |                            |                      |                                                                           |
| 16 |                            |                      |                                                                           |
| 17 | Statistics: additional     | <a href="#">#20b</a> | Methods for any additional analyses (eg, subgroup and 14-15               |
| 18 | analyses                   |                      | adjusted analyses)                                                        |
| 19 |                            |                      |                                                                           |
| 20 |                            |                      |                                                                           |
| 21 | Statistics: analysis       | <a href="#">#20c</a> | Definition of analysis population relating to protocol non- 15            |
| 22 | population and             |                      | adherence (eg, as randomised analysis), and any statistical               |
| 23 | missing data               |                      | methods to handle missing data (eg, multiple imputation)                  |
| 24 |                            |                      |                                                                           |
| 25 |                            |                      |                                                                           |
| 26 |                            |                      |                                                                           |
| 27 | <b>Methods: Monitoring</b> |                      |                                                                           |
| 28 |                            |                      |                                                                           |
| 29 | Data monitoring:           | <a href="#">#21a</a> | Composition of data monitoring committee (DMC); summary 14                |
| 30 | formal committee           |                      | of its role and reporting structure; statement of whether it is           |
| 31 |                            |                      | independent from the sponsor and competing interests; and                 |
| 32 |                            |                      | reference to where further details about its charter can be               |
| 33 |                            |                      | found, if not in the protocol. Alternatively, an explanation of           |
| 34 |                            |                      | why a DMC is not needed                                                   |
| 35 |                            |                      |                                                                           |
| 36 |                            |                      |                                                                           |
| 37 |                            |                      |                                                                           |
| 38 |                            |                      |                                                                           |
| 39 | Data monitoring:           | <a href="#">#21b</a> | Description of any interim analyses and stopping guidelines, 14           |
| 40 | interim analysis           |                      | including who will have access to these interim results and               |
| 41 |                            |                      | make the final decision to terminate the trial                            |
| 42 |                            |                      |                                                                           |
| 43 |                            |                      |                                                                           |
| 44 | Harms                      | <a href="#">#22</a>  | Plans for collecting, assessing, reporting, and managing N/A –            |
| 45 |                            |                      | solicited and spontaneously reported adverse events and other educational |
| 46 |                            |                      | unintended effects of trial interventions or trial conduct trial          |
| 47 |                            |                      |                                                                           |
| 48 |                            |                      |                                                                           |
| 49 | Auditing                   | <a href="#">#23</a>  | Frequency and procedures for auditing trial conduct, if any, N/A –        |
| 50 |                            |                      | and whether the process will be independent from educational              |
| 51 |                            |                      | investigators and the sponsor trial                                       |
| 52 |                            |                      |                                                                           |
| 53 |                            |                      |                                                                           |
| 54 |                            |                      |                                                                           |
| 55 | <b>Ethics and</b>          |                      |                                                                           |
| 56 | <b>dissemination</b>       |                      |                                                                           |
| 57 |                            |                      |                                                                           |
| 58 |                            |                      |                                                                           |
| 59 |                            |                      |                                                                           |
| 60 |                            |                      |                                                                           |

|    |                       |                      |                                                                 |             |
|----|-----------------------|----------------------|-----------------------------------------------------------------|-------------|
| 1  | Research ethics       | <a href="#">#24</a>  | Plans for seeking research ethics committee / institutional     | 3           |
| 2  | approval              |                      | review board (REC / IRB) approval                               |             |
| 3  |                       |                      |                                                                 |             |
| 4  |                       |                      |                                                                 |             |
| 5  | Protocol amendments   | <a href="#">#25</a>  | Plans for communicating important protocol modifications        | N/A –       |
| 6  |                       |                      | (eg, changes to eligibility criteria, outcomes, analyses) to    | educational |
| 7  |                       |                      | relevant parties (eg, investigators, REC / IRBs, trial          | trial       |
| 8  |                       |                      | participants, trial registries, journals, regulators)           |             |
| 9  |                       |                      |                                                                 |             |
| 10 |                       |                      |                                                                 |             |
| 11 | Consent or assent     | <a href="#">#26a</a> | Who will obtain informed consent or assent from potential       | 9           |
| 12 |                       |                      | trial participants or authorised surrogates, and how (see Item  |             |
| 13 |                       |                      | 32)                                                             |             |
| 14 |                       |                      |                                                                 |             |
| 15 |                       |                      |                                                                 |             |
| 16 |                       |                      |                                                                 |             |
| 17 | Consent or assent:    | <a href="#">#26b</a> | Additional consent provisions for collection and use of         | N/A –       |
| 18 | ancillary studies     |                      | participant data and biological specimens in ancillary studies, | educational |
| 19 |                       |                      | if applicable                                                   | trial       |
| 20 |                       |                      |                                                                 |             |
| 21 |                       |                      |                                                                 |             |
| 22 | Confidentiality       | <a href="#">#27</a>  | How personal information about potential and enrolled           | 14          |
| 23 |                       |                      | participants will be collected, shared, and maintained in order |             |
| 24 |                       |                      | to protect confidentiality before, during, and after the trial  |             |
| 25 |                       |                      |                                                                 |             |
| 26 |                       |                      |                                                                 |             |
| 27 | Declaration of        | <a href="#">#28</a>  | Financial and other competing interests for principal           | 16          |
| 28 | interests             |                      | investigators for the overall trial and each study site         |             |
| 29 |                       |                      |                                                                 |             |
| 30 |                       |                      |                                                                 |             |
| 31 | Data access           | <a href="#">#29</a>  | Statement of who will have access to the final trial dataset,   | 14          |
| 32 |                       |                      | and disclosure of contractual agreements that limit such        |             |
| 33 |                       |                      | access for investigators                                        |             |
| 34 |                       |                      |                                                                 |             |
| 35 |                       |                      |                                                                 |             |
| 36 |                       |                      |                                                                 |             |
| 37 | Ancillary and post    | <a href="#">#30</a>  | Provisions, if any, for ancillary and post-trial care, and for  | N/A –       |
| 38 | trial care            |                      | compensation to those who suffer harm from trial                | educational |
| 39 |                       |                      | participation                                                   | trial       |
| 40 |                       |                      |                                                                 |             |
| 41 |                       |                      |                                                                 |             |
| 42 | Dissemination policy: | <a href="#">#31a</a> | Plans for investigators and sponsor to communicate trial        | 15          |
| 43 | trial results         |                      | results to participants, healthcare professionals, the public,  |             |
| 44 |                       |                      | and other relevant groups (eg, via publication, reporting in    |             |
| 45 |                       |                      | results databases, or other data sharing arrangements),         |             |
| 46 |                       |                      | including any publication restrictions                          |             |
| 47 |                       |                      |                                                                 |             |
| 48 |                       |                      |                                                                 |             |
| 49 |                       |                      |                                                                 |             |
| 50 | Dissemination policy: | <a href="#">#31b</a> | Authorship eligibility guidelines and any intended use of       | 15          |
| 51 | authorship            |                      | professional writers                                            |             |
| 52 |                       |                      |                                                                 |             |
| 53 |                       |                      |                                                                 |             |
| 54 | Dissemination policy: | <a href="#">#31c</a> | Plans, if any, for granting public access to the full protocol, | N/A         |
| 55 | reproducible research |                      | participant-level dataset, and statistical code                 |             |
| 56 |                       |                      |                                                                 |             |
| 57 |                       |                      |                                                                 |             |

## Appendices

|    |                      |                     |                                                               |             |
|----|----------------------|---------------------|---------------------------------------------------------------|-------------|
| 1  | Informed consent     | <a href="#">#32</a> | Model consent form and other related documentation given to   | Appendix    |
| 2  | materials            |                     | participants and authorised surrogates                        |             |
| 3  |                      |                     |                                                               |             |
| 4  | Biological specimens | <a href="#">#33</a> | Plans for collection, laboratory evaluation, and storage of   | N/A –       |
| 5  |                      |                     | biological specimens for genetic or molecular analysis in the | educational |
| 6  |                      |                     | current trial and for future use in ancillary studies, if     | trial       |
| 7  |                      |                     | applicable                                                    |             |
| 8  |                      |                     |                                                               |             |
| 9  |                      |                     |                                                               |             |
| 10 |                      |                     |                                                               |             |

11 None The SPIRIT checklist is distributed under the terms of the Creative Commons Attribution License CC-  
12 BY-ND 3.0. This checklist can be completed online using <https://www.goodreports.org/>, a tool made by the  
13 [EQUATOR Network](#) in collaboration with [Penelope.ai](#)  
14  
15
